# Supplementary material
Source: PubMed Central journal article supplement (PMC4904378)
Supplement: BRN628054_Supplementary_FigS7thru9.pdf [file BRN628054_Supplementary_FigS7thru9.pdf]

Country colored by CCAC%8ct

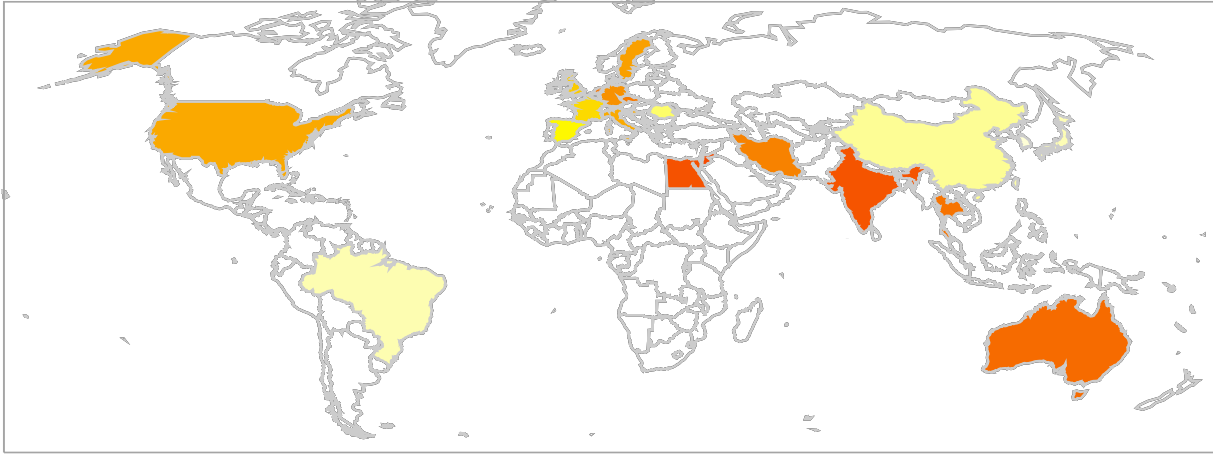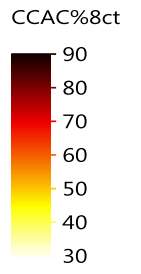

Country colored by CCAC%8ca

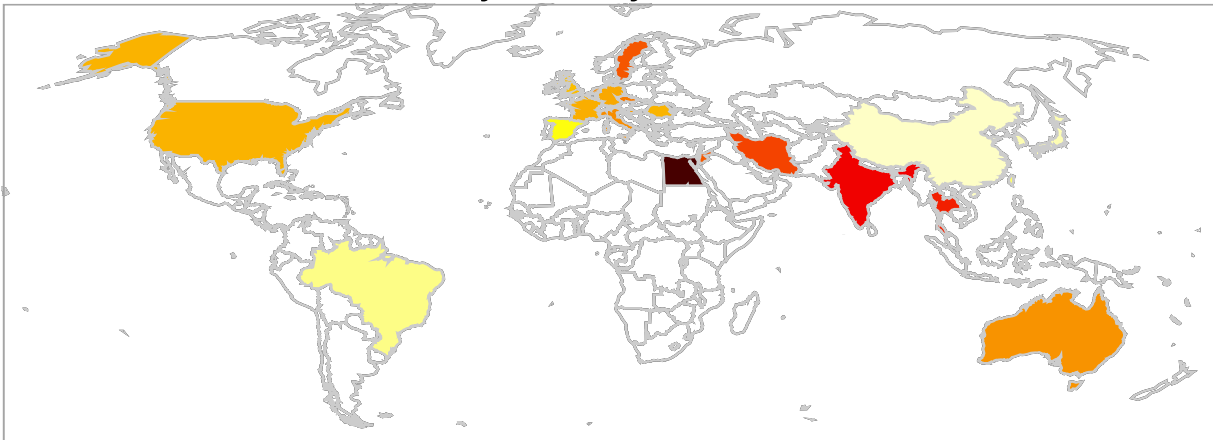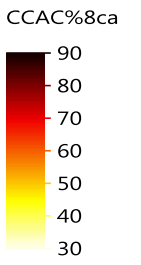

Country colored by RR8CCAC

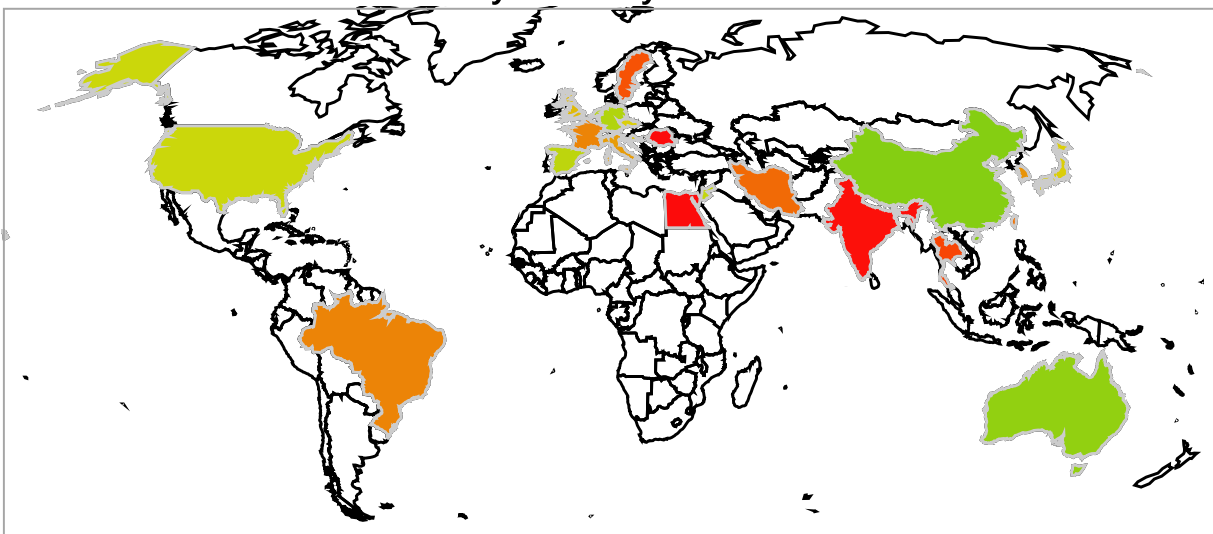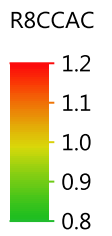

Figure S7.

Country colored by CC%8ct

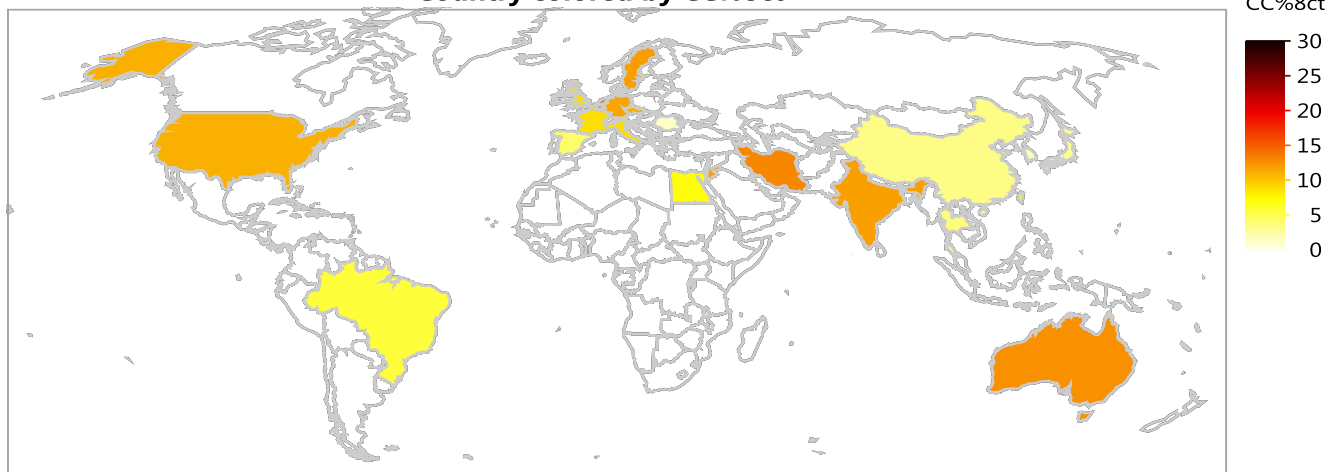

Country colored by CC%8ca

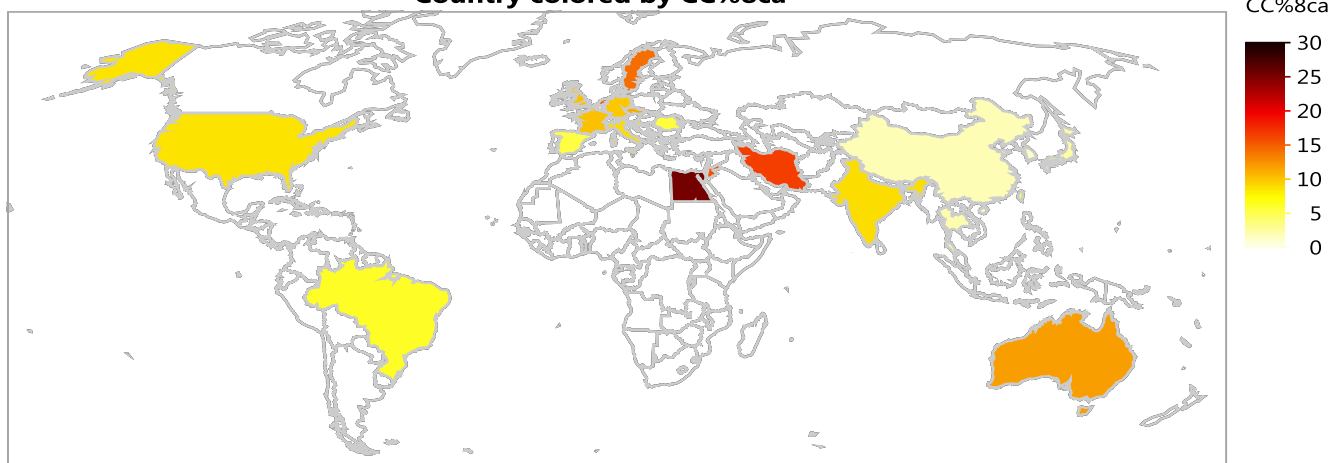

Country colored by RR8CC

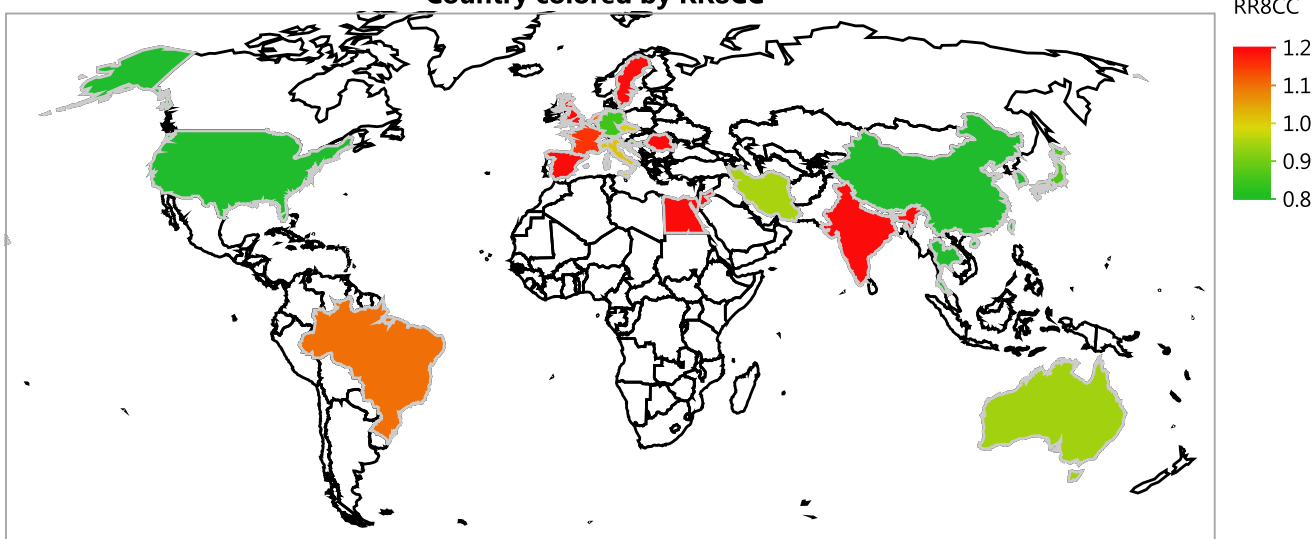

Figure S8.

Country colored by AC%8ct

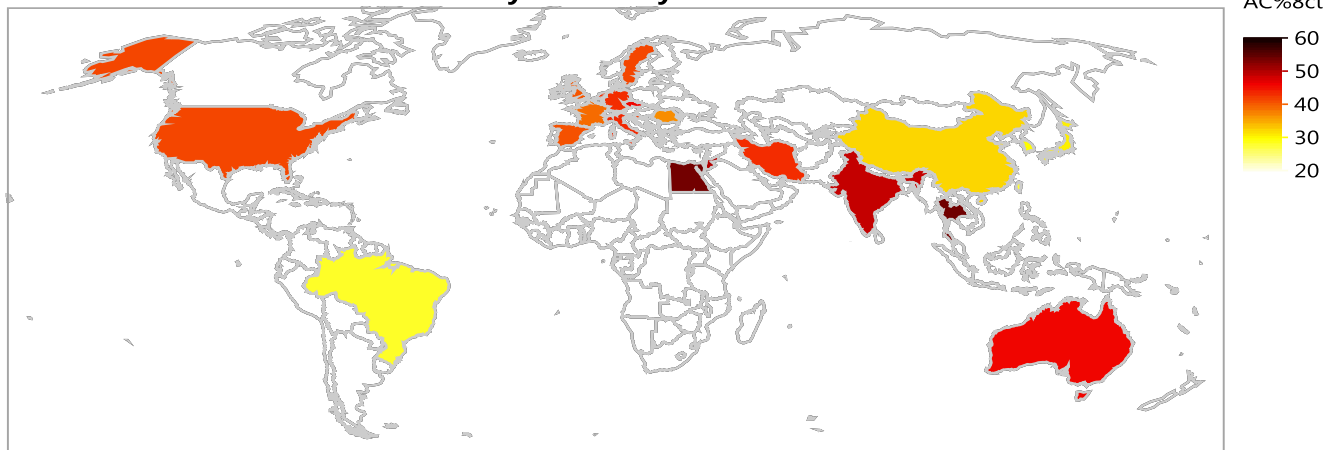

Country colored by AC%8ca

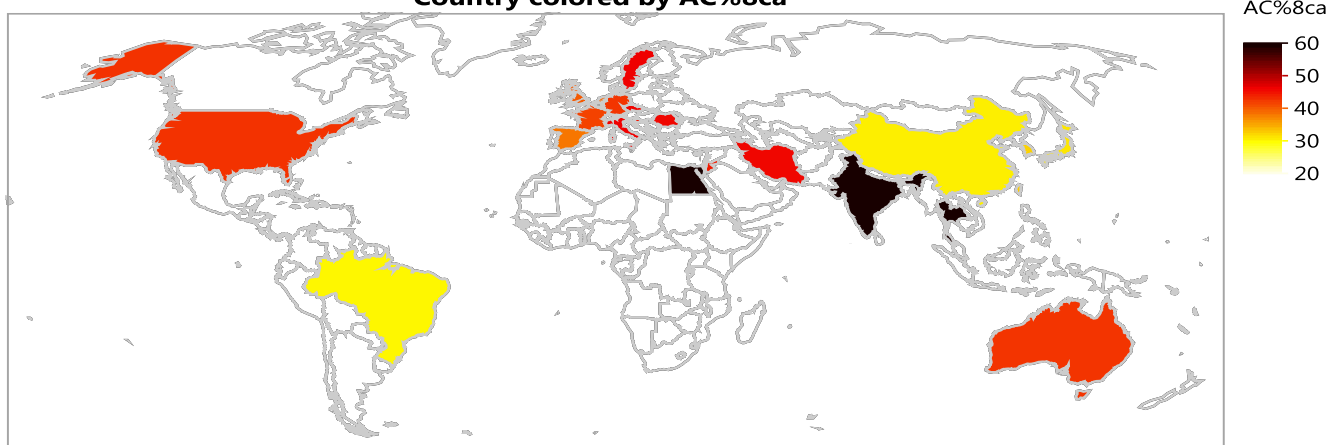

Country colored by RR8AC

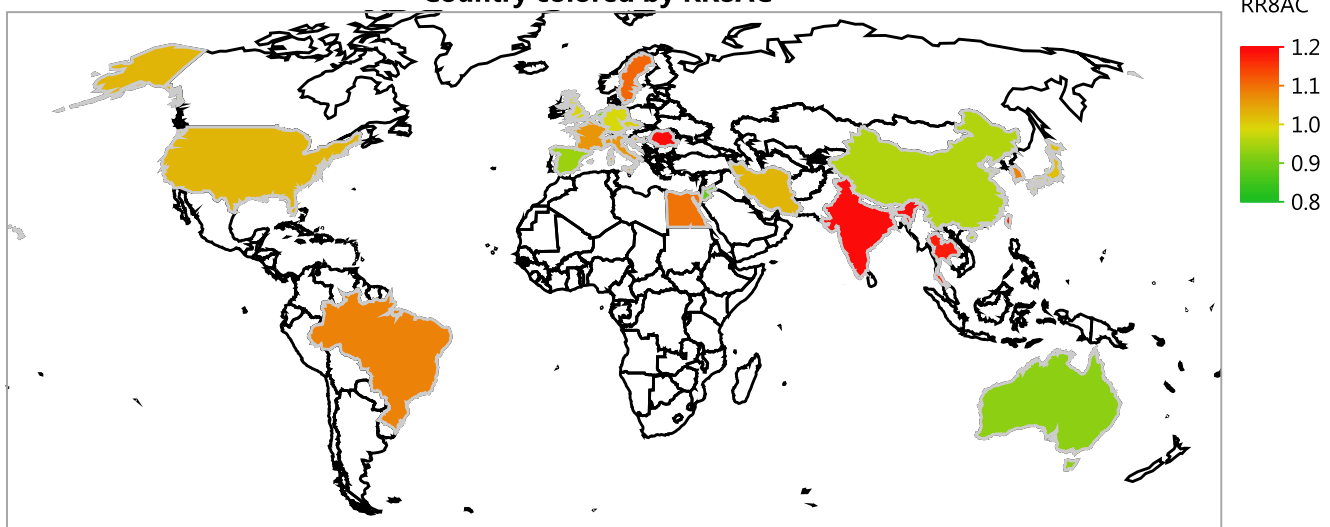

Figure S9.
