# Supplementary material
Source: PubMed Central journal article supplement (PMC4904378)
Supplement: BRN628054_Supplementary_FigS10thru12.pdf [file BRN628054_Supplementary_FigS10thru12.pdf]

### Relative risk meta-analysis plot (fixed effects)

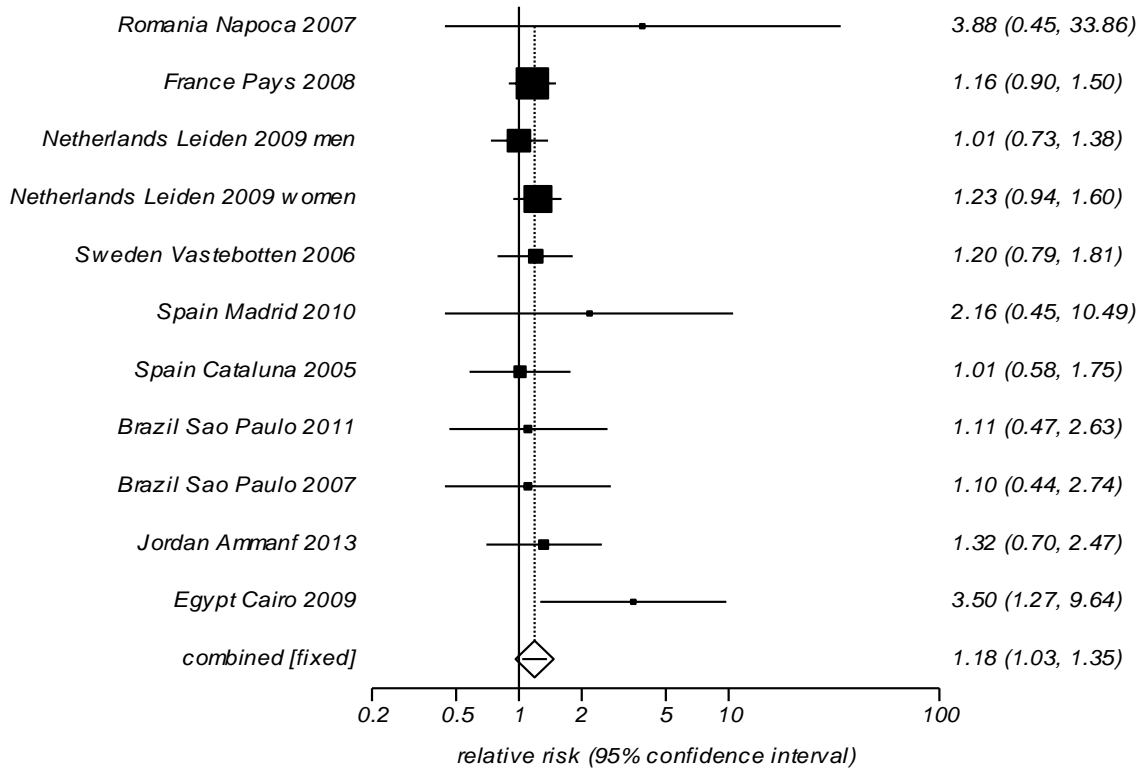

Figure S10.

Relative risk meta-analysis plot (fixed effects)

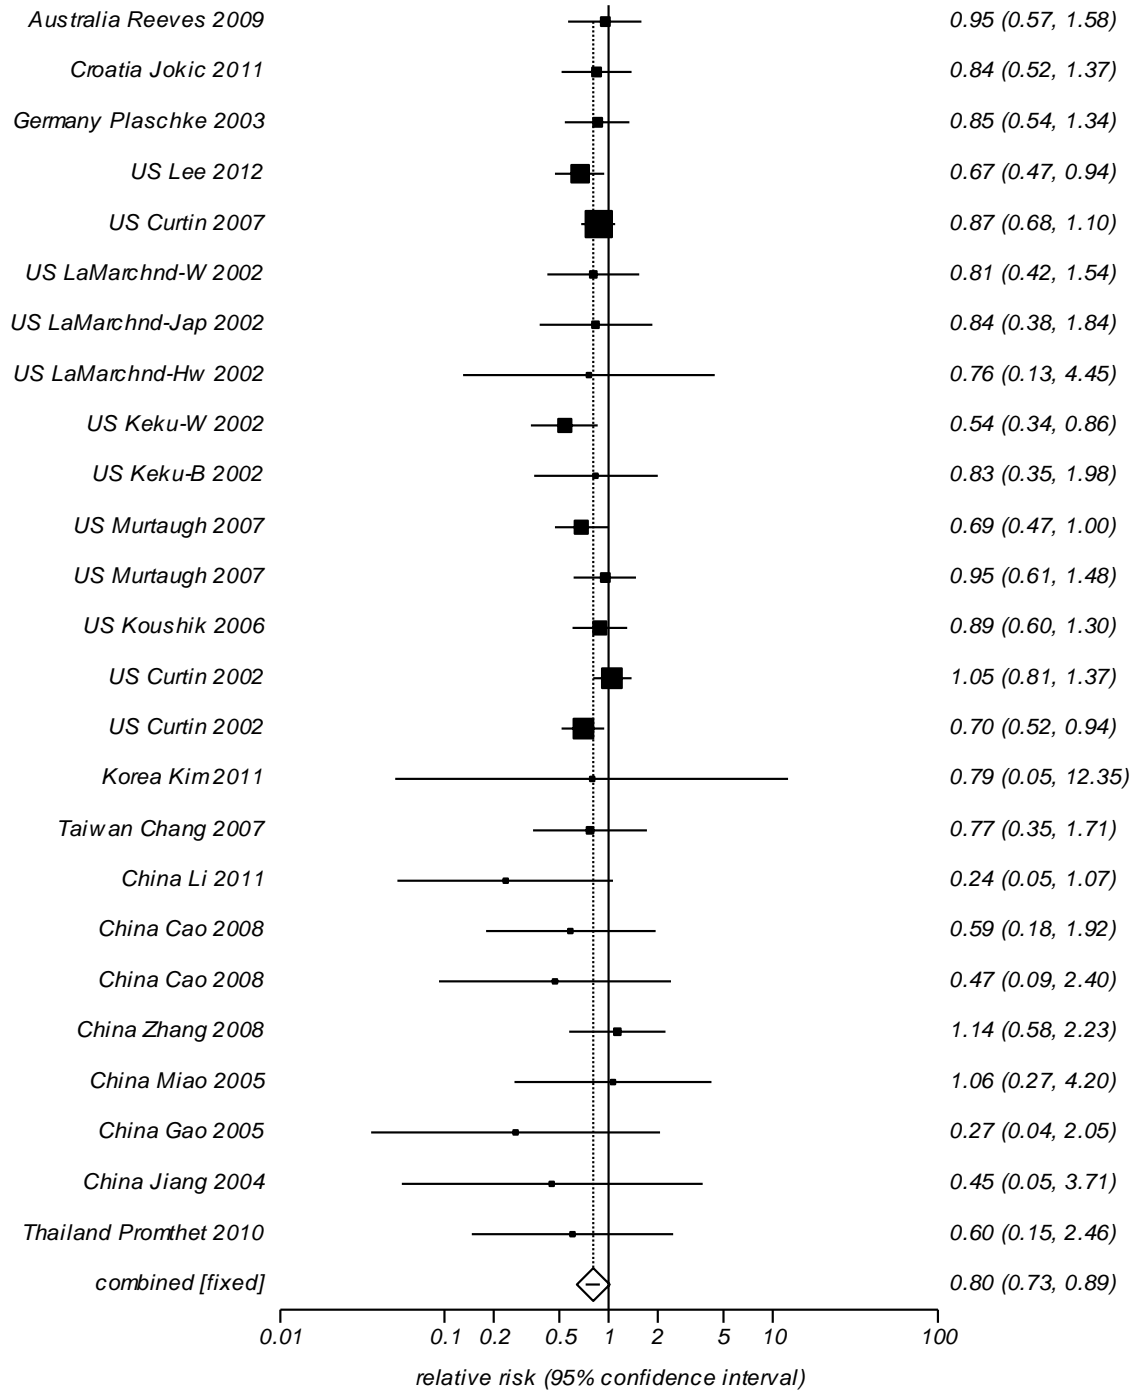

Figure S11.

### Relative risk meta-analysis plot (random effects)

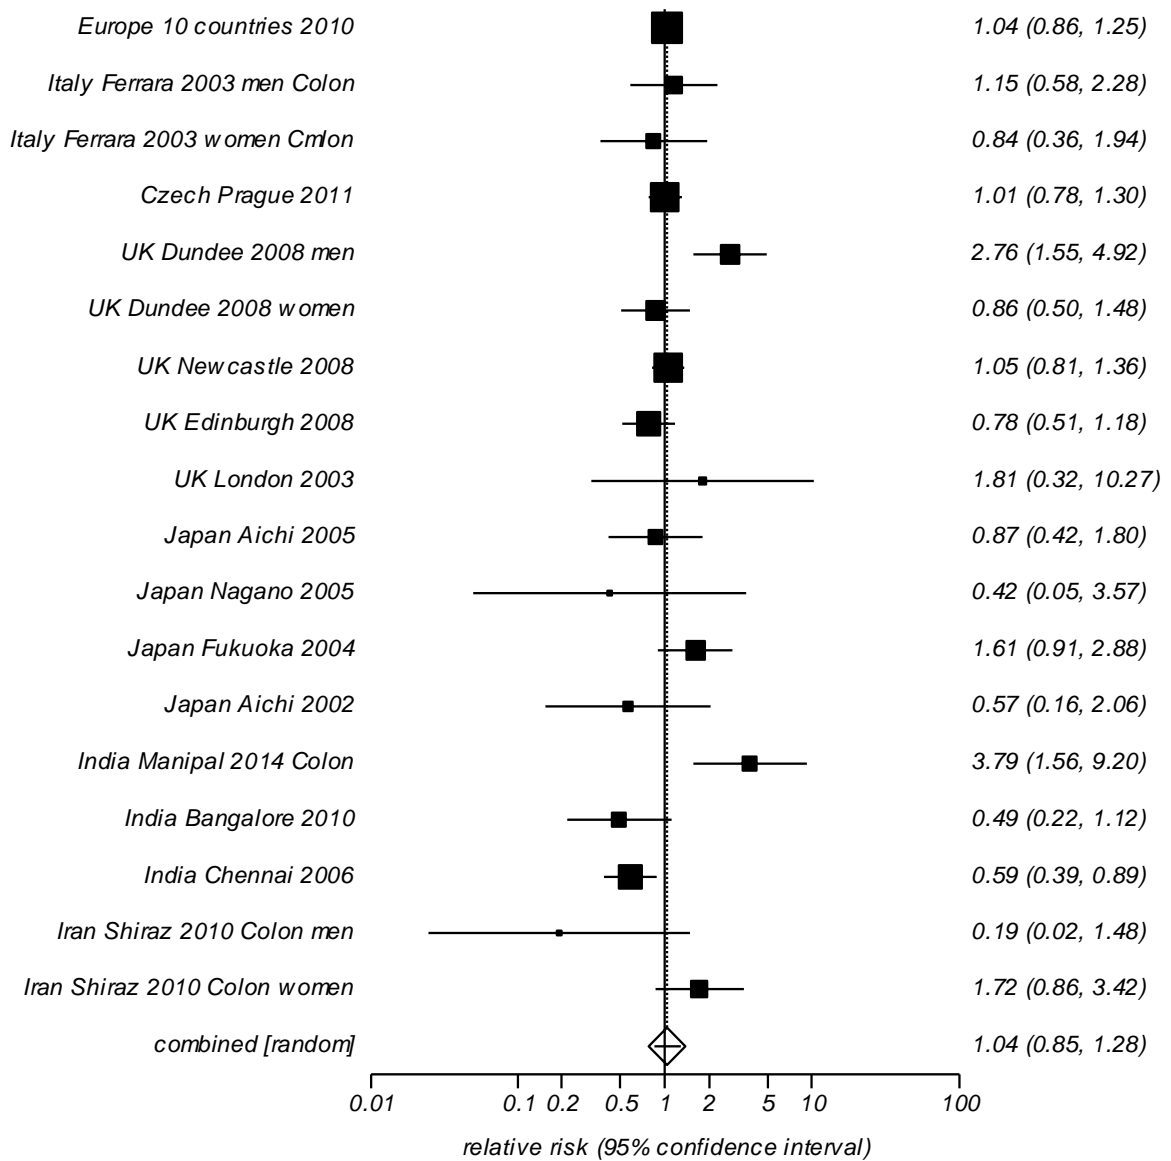

Figure S12.
