# Supplementary material
Source: PubMed Central journal article supplement (PMC4904378)
Supplement: BRN628054_Supplementary_FigS13.pdf [file BRN628054_Supplementary_FigS13.pdf]

| <b>All Rows</b> |           |                 |                   |
|-----------------|-----------|-----------------|-------------------|
| Count           | 92        | <b>LogWorth</b> | <b>Difference</b> |
| Mean            | 12.291469 | 2.0255935       | 4.33945           |
| Std Dev         | 5.985863  |                 |                   |

  

| <b>APdeath3(2)</b> |           | <b>APdeath3(., 4, 3)</b> |           |
|--------------------|-----------|--------------------------|-----------|
| Count              | 22        | Count                    | 70        |
| Mean               | 8.9897148 | Mean                     | 13.329163 |
| Std Dev            | 5.5605139 | Std Dev                  | 5.76856   |

Figure S13.
