# Supplementary material
Source: PubMed Central journal article supplement (PMC4904378)
Supplement: BRN628054_Supplementary_FigsS3ThruS5.pdf [file BRN628054_Supplementary_FigsS3ThruS5.pdf]

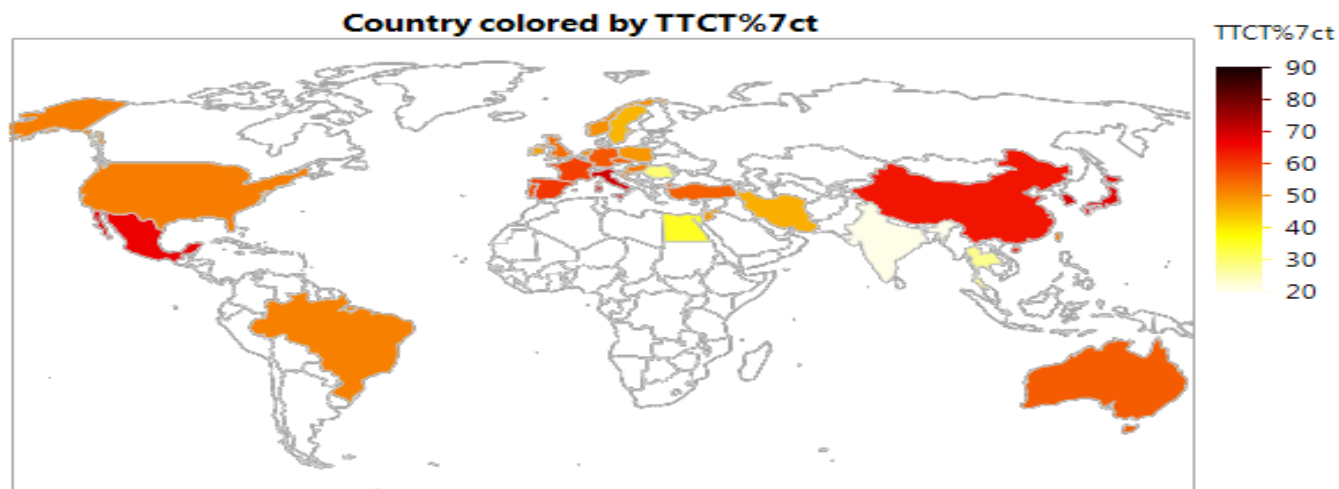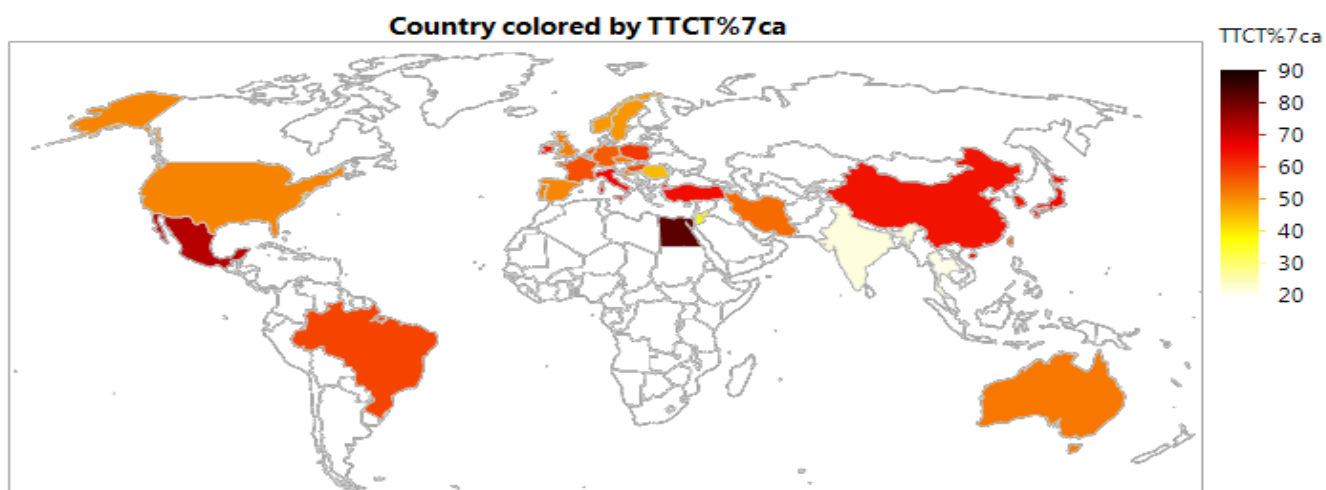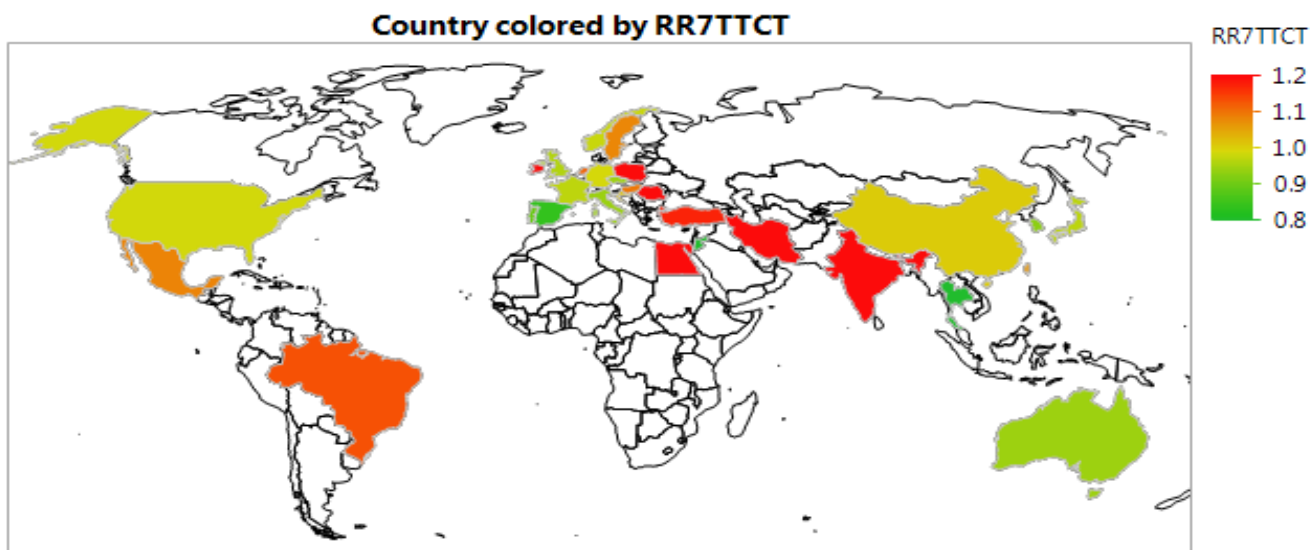

Figure S3.

Country colored by TT%7ct

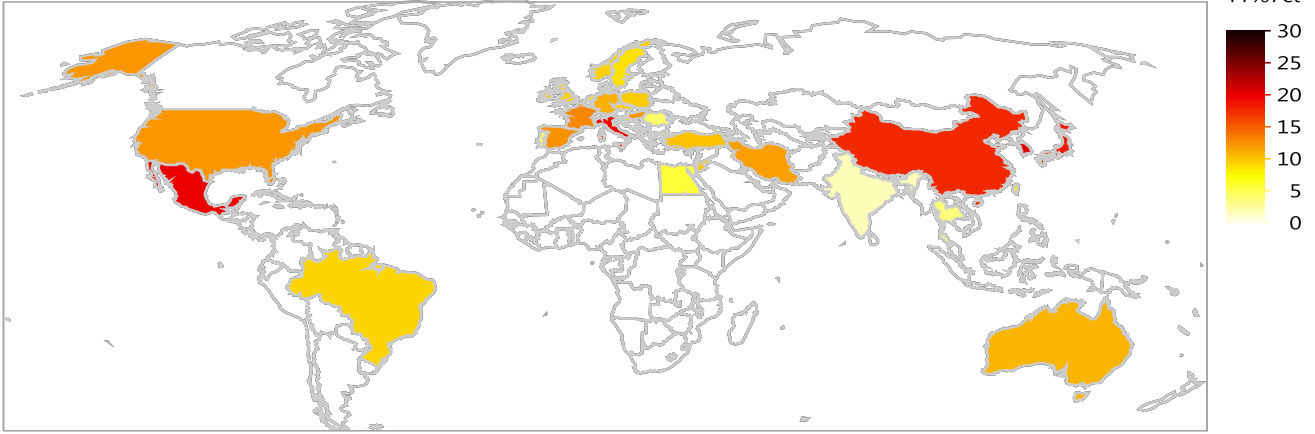

Country colored by TT%7ca

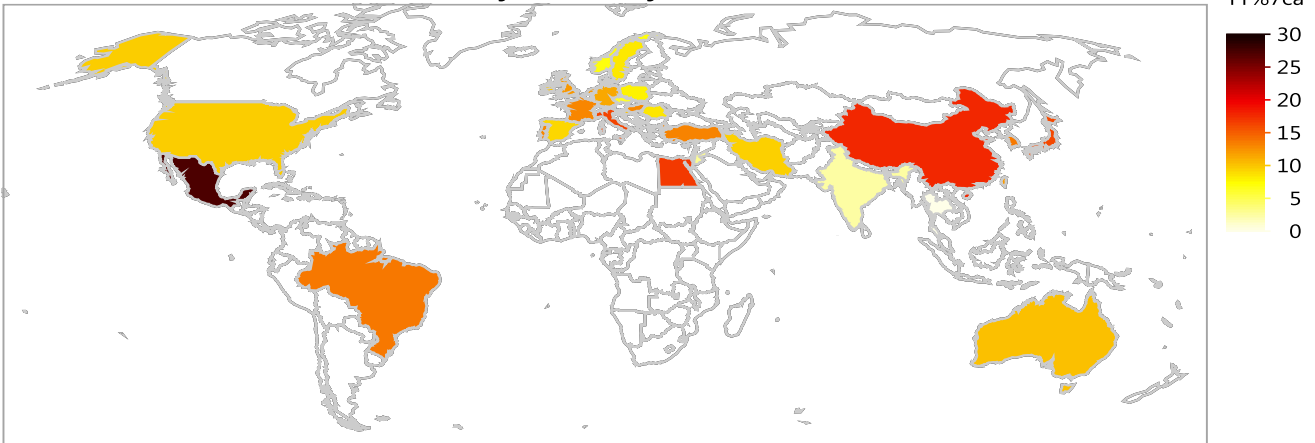

Country colored by RR7TT

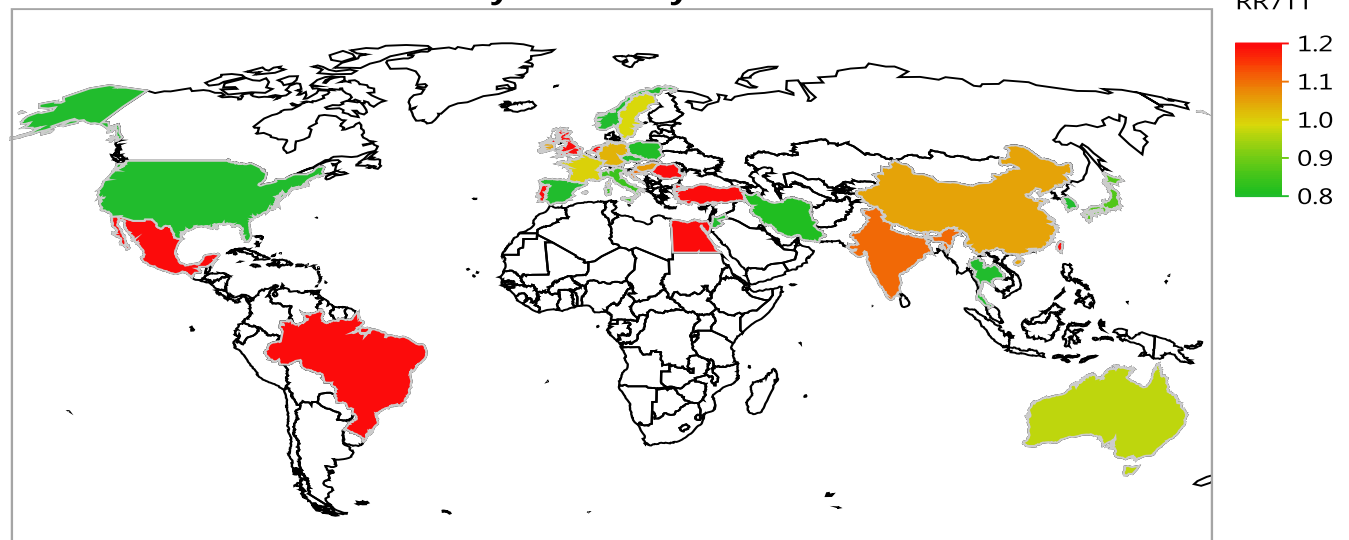

Figure S4.

Country colored by CT%7ct

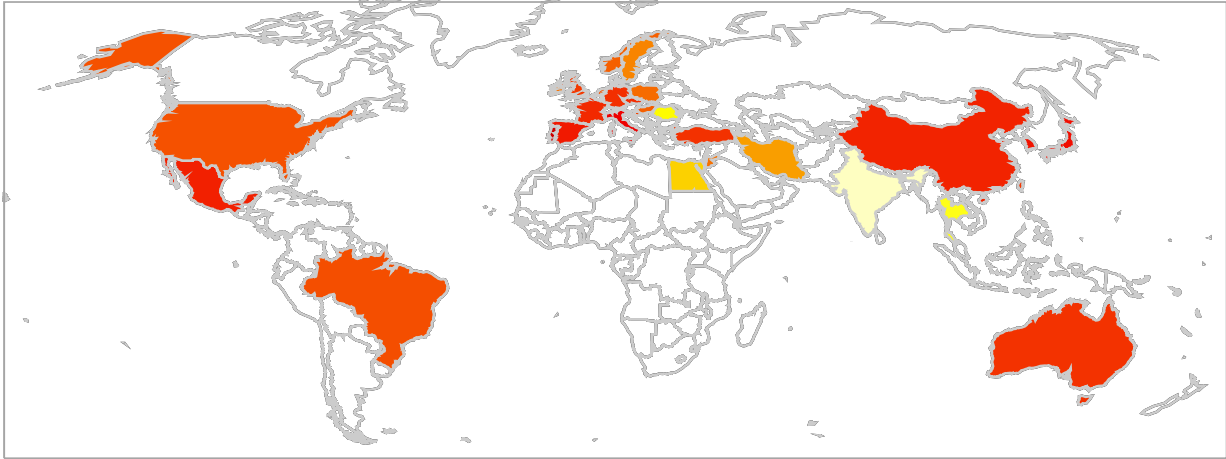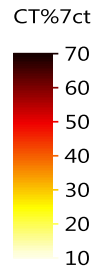

Country colored by CT%7ca

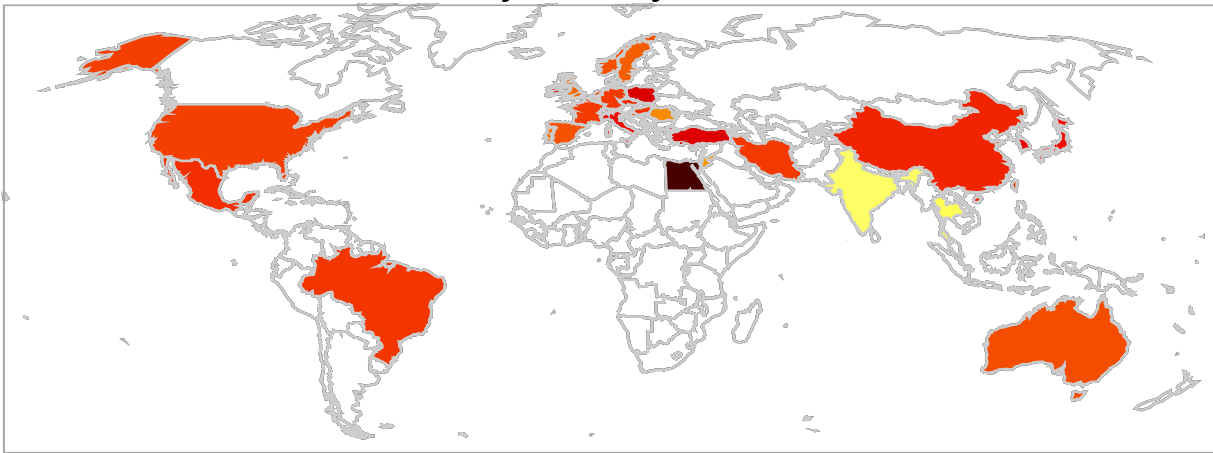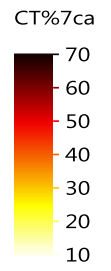

Country colored by RR7CT

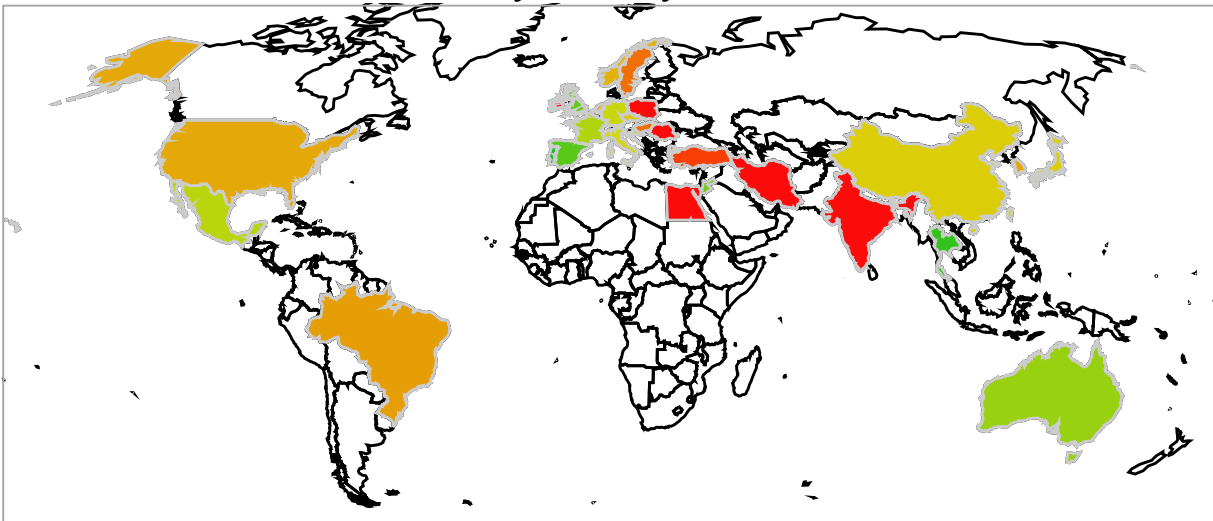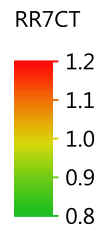

Figure S5.
