# Supplementary material
Source: PubMed Central journal article supplement (PMC4904378)
Supplement: BRN628054supplementary_tablesl.pdf [file BRN628054supplementary_tablesl.pdf]

Table S1. Quality score items for meta-analysis of gene mutations between case and control groups.

| Item                     | Score | Notes                                            |
|--------------------------|-------|--------------------------------------------------|
| External validity (0–11) |       |                                                  |
| Age                      | 0/1   | Ranges or statistics per groups                  |
| Gender                   | 0/1   | Gender data per groups                           |
| Race/ethnicity           | 0/1   | Race or ethnic data per groups                   |
| Matched groups           | 0/1   | Demographic data matched                         |
| Disease progression      | 0–2   | Cancer site and stages                           |
| Diagnosis method         | 0/1   | Cancer diagnosis method                          |
| Health status            | 0/1   | Health status of control group                   |
| Case random sample       | 0/1   | Random sample for cancer group                   |
| Control random sample    | 0/1   | Random sample for control group                  |
| HWE                      | 0/1   | Hardy-Weinberg equilibrium for control group     |
| Internal validity (0–12) |       |                                                  |
| Case recruitment         | 0/1   | Case group recruitment and sampling indicated    |
| Control recruitment      | 0/1   | Control group recruitment and sampling           |
| Same period              | 0/1   | Groups recruited over the same period            |
| Data source              | 0/1   | Sample sources such as blood or tissue indicated |
| Setting                  | 0/1   | Data collection setting indicated                |
| Procedure                | 0/1   | Data collection procedures indicated             |

|                         |     |                                                   |
|-------------------------|-----|---------------------------------------------------|
| Blind                   | 0/1 | Data analysis blinding method indicated           |
| Sample handling         | 0/1 | Specimen handling procedures indicated            |
| DNA analysis            | 0/1 | DNA analysis procedure described                  |
| Accuracy                | 0/1 | Accuracy of instrumentation analysis indicated    |
| Precision               | 0/1 | Precision of instrumentation indicated            |
| Reliability             | 0/1 | Reliability of instrumentation analysis indicated |
| Reporting quality (0–6) |     |                                                   |
| Sample Size Estimate    | 0/1 | A-priori sample size estimate                     |
| Tables                  | 0/1 | At least two tables for data report               |
| Table Footnote          | 0/1 | Tables with footnotes                             |
| Details                 | 0/1 | Results with detailed quality                     |
| Clear                   | 0/1 | Results are clearly reported                      |
| Valid Sense             | 0/1 | Results are valid, making sense without bias      |
| Confounding             | 0/1 | Subgroups or confounding variables included       |

---

*Note.* Total possible score = 29.

Table S2. Summary of participant characteristics and *MTHFR* 677 and 1298 loci distributions for studies on colorectal (CR) cancer included in this review, by geographic location.

| First Author, Year<br>(Ref. No.) <sup>1</sup> | Ethnicity<br>(Country)                    | Source<br>(Controls)                      | Cancer Site<br>(Cases) &<br>Sex | <i>MTHFR</i> 677   |            |            |                       |             |            | <i>MTHFR</i> 1298  |            |            |                       |             |             | Quality Score <sup>2</sup> |          |           |          |         |
|-----------------------------------------------|-------------------------------------------|-------------------------------------------|---------------------------------|--------------------|------------|------------|-----------------------|-------------|------------|--------------------|------------|------------|-----------------------|-------------|-------------|----------------------------|----------|-----------|----------|---------|
|                                               |                                           |                                           |                                 | Cases <i>n</i> (%) |            |            | Controls <i>n</i> (%) |             |            | Cases <i>n</i> (%) |            |            | Controls <i>n</i> (%) |             |             | External                   | Internal | Reporting |          |         |
|                                               |                                           |                                           |                                 | CC                 | CT         | TT         | CC                    | CT          | TT         | HWE                | AA         | AC         | CC                    | AA          | AC          | CC                         | HWE      | Validity  | Validity | Quality |
| Australia                                     |                                           |                                           |                                 |                    |            |            |                       |             |            |                    |            |            |                       |             |             |                            |          |           |          |         |
| Liu, 2012 (37)                                | Caucasian<br>(Australia)                  | Healthy<br>adults                         | CR mixed                        | 50 (45)            | 47 (42)    | 15 (13)    | 43 (38)               | 53 (47)     | 18 (16)    | Yes                |            |            |                       |             |             |                            |          | 7         | 8        | 6       |
| Iacopetta, 2009<br>(38)                       | Caucasian<br>(Australia)                  | Adults w/o<br>CR cancer                   | Colon                           | 382 (44.9)         | 386 (45.4) | 82 (9.7)   | 428 (44.7)            | 429 (44.8)  | 101 (10.5) | Yes                |            |            |                       |             |             |                            |          | 10        | 9        | 6       |
|                                               |                                           |                                           | Male                            | 222 (43.1)         | 245 (47.6) | 48 (9.3)   | 240 (42.7)            | 260 (46.3)  | 62 (11.0)  |                    |            |            |                       |             |             |                            |          |           |          |         |
|                                               |                                           |                                           | Female                          | 160 (47.8)         | 141 (42.1) | 34 (10.1)  | 188 (47.5)            | 169 (42.7)  | 39 (9.8)   |                    |            |            |                       |             |             |                            |          |           |          |         |
|                                               |                                           |                                           | Proximal                        | 107 (38.9)         | 137 (49.8) | 31 (11.3)  |                       |             |            |                    |            |            |                       |             |             |                            |          |           |          |         |
|                                               |                                           |                                           | Male                            | 56 (38.4)          | 75 (51.4)  | 15 (10.3)  |                       |             |            |                    |            |            |                       |             |             |                            |          |           |          |         |
|                                               |                                           |                                           | Female                          | 51 (39.8)          | 61 (47.7)  | 16 (12.5)  |                       |             |            |                    |            |            |                       |             |             |                            |          |           |          |         |
|                                               |                                           |                                           | Distal                          | 275 (47.8)         | 249 (43.3) | 51 (8.9)   |                       |             |            |                    |            |            |                       |             |             |                            |          |           |          |         |
|                                               |                                           |                                           | Male                            | 166 (45.1)         | 169 (45.9) | 33 (9.0)   |                       |             |            |                    |            |            |                       |             |             |                            |          |           |          |         |
|                                               |                                           |                                           | Female                          | 109 (52.7)         | 80 (38.6)  | 18 (8.7)   |                       |             |            |                    |            |            |                       |             |             |                            |          |           |          |         |
| Reeves, 2009 (39)                             | Caucasian<br>(Australia)                  | Adults w/o<br>CR cancer                   | CR mixed                        | 105 (51.0)         | 83 (40.3)  | 18 (8.7)   | 101 (47.9)            | 91 (43.1)   | 19 (9.0)   | Yes                | 92 (44.7)  | 89 (43.2)  | 25 (12.1)             | 86 (40.8)   | 98 (46.4)   | 27 (12.8)                  | Yes      | 7         | 6        | 6       |
| Shannon, 2002<br>(40)                         | Caucasian<br>(Australia)                  | Adults<br>w/other<br>health<br>conditions | Colon                           | 249 (49.7)         | 197 (39.3) | 55 (11.0)  | 533 (44.2)            | 560 (46.4)  | 114 (9.4)  | Yes                |            |            |                       |             |             |                            |          | 7         | 6        | 6       |
|                                               |                                           |                                           | Male                            | 115 (49.8)         | 96 (41.6)  | 20 (8.6)   |                       |             |            |                    |            |            |                       |             |             |                            |          |           |          |         |
|                                               |                                           |                                           | Female                          | 134 (49.6)         | 101 (37.4) | 35 (13.0)  |                       |             |            |                    |            |            |                       |             |             |                            |          |           |          |         |
|                                               |                                           |                                           | Proximal                        | 129 (46.4)         | 118 (42.4) | 31 (11.2)  |                       |             |            |                    |            |            |                       |             |             |                            |          |           |          |         |
|                                               |                                           |                                           | Distal                          | 120 (53.8)         | 79 (35.4)  | 24 (10.8)  |                       |             |            |                    |            |            |                       |             |             |                            |          |           |          |         |
| Europe                                        |                                           |                                           |                                 |                    |            |            |                       |             |            |                    |            |            |                       |             |             |                            |          |           |          |         |
| Eussen, 2010 (41)                             | Caucasian (10<br>countries <sup>3</sup> ) | Adults w/o<br>cancer                      | CR mixed                        | 567 (42.7)         | 608 (45.7) | 154 (11.6) | 1019 (43.1)           | 1076 (45.5) | 271 (11.4) | Yes                | 605 (45.5) | 574 (43.2) | 151 (11.3)            | 1099 (46.5) | 1007 (42.6) | 259 (10.9)                 | Yes      | 9         | 8        | 6       |
| Osian, 2007 (42)                              | Caucasian<br>(Romania)                    | Healthy<br>adults                         | CR mixed                        | 38 (55.1)          | 25 (36.2)  | 6 (8.7)    | 47 (70.1)             | 17 (25.4)   | 3 (4.5)    | Yes                | 33 (47.8)  | 32 (46.4)  | 4 (5.8)               | 41 (61.2)   | 25 (37.3)   | 1 (1.5)                    | Yes      | 10        | 7        | 4       |
| Jokić, 2011 (43)                              | Caucasian<br>(Croatia)                    | Healthy<br>adults                         | Colon                           | 139 (46.3)         | 130 (43.3) | 31 (10.4)  | 142 (47.3)            | 130 (43.3)  | 28 (9.4)   | Yes                | 137 (45.7) | 136 (45.3) | 27 (9.0)              | 140 (46.7)  | 128 (42.7)  | 32 (10.6)                  | Yes      | 7         | 4        | 6       |
| Battistelli, 2006                             | Caucasian                                 | Healthy                                   | CR mixed                        | 32 (34.4)          | 40 (43.0)  | 21 (22.6)  | 30 (30.0)             | 51 (51.0)   | 19         | Yes                |            |            |                       |             |             |                            |          | 8         | 6        | 4       |

|                       |               |                |          |            |            |           |            |            |        |                  |            |            |           |            |            |           |     |    |    |   |
|-----------------------|---------------|----------------|----------|------------|------------|-----------|------------|------------|--------|------------------|------------|------------|-----------|------------|------------|-----------|-----|----|----|---|
| (44)                  | (Italy)       | adults         |          |            |            |           |            |            | (19.0) |                  |            |            |           |            |            |           |     |    |    |   |
|                       | Caucasian     | Adults w/o     |          |            |            |           |            |            | 56     |                  |            |            |           |            |            |           |     |    |    |   |
| Toffoli, 2003 (45)    | (Italy)       | cancer         | Colon    | 93 (33.7)  | 145 (52.5) | 38 (13.8) | 83 (29.7)  | 140 (50.2) | (20.1) | Yes              | 122 (44.2) | 129 (46.7) | 25 (6.9)  | 133 (47.6) | 121 (43.4) | 25 (9.0)  | Yes | 7  | 6  | 6 |
|                       |               |                |          |            |            |           |            |            | 34     |                  |            |            |           |            |            |           |     |    |    |   |
|                       |               |                | Male     | 51 (34.0)  | 75 (50.0)  | 24 (16.0) | 51 (29.5)  | 88 (50.9)  | (19.6) |                  | 70 (46.7)  | 65 (43.3)  | 15 (10.0) | 87 (50.3)  | 71 (41.0)  | 15 (8.7)  |     |    |    |   |
|                       |               |                |          |            |            |           |            |            | 22     |                  |            |            |           |            |            |           |     |    |    |   |
|                       |               |                | Female   | 42 (33.3)  | 70 (55.6)  | 14 (11.1) | 32 (30.2)  | 52 (49.1)  | (20.7) |                  | 52 (41.3)  | 64 (50.8)  | 10 (7.9)  | 46 (43.4)  | 50 (47.2)  | 10 (9.4)  |     |    |    |   |
|                       |               |                | Proximal | 46 (34.3)  | 78 (58.2)  | 10 (7.5)  |            |            |        |                  | 65 (45.8)  | 59 (41.5)  | 18 (12.7) |            |            |           |     |    |    |   |
|                       |               |                | Distal   | 47 (33.1)  | 67 (47.2)  | 28 (19.7) |            |            |        |                  | 57 (42.5)  | 70 (52.2)  | 7 (5.2)   |            |            |           |     |    |    |   |
|                       |               | Adults w/other |          |            |            |           |            |            |        |                  |            |            |           |            |            |           |     |    |    |   |
|                       | Caucasian     | health         |          |            |            | 126       |            |            | 117    |                  |            |            |           |            |            |           |     |    |    |   |
| Komlósi, 2010 (46)    | (Hungary)     | conditions     | CR each  | 398 (41.9) | 427 (44.9) | (13.2)    | 442 (47.0) | 380 (40.5) | (12.5) | No <sup>4</sup>  |            |            |           |            |            |           |     | 7  | 10 | 6 |
|                       |               |                |          |            |            |           |            |            | 59     |                  |            |            |           |            |            |           |     |    |    |   |
|                       |               |                | Colon    | 208 (44.1) | 196 (41.5) | 68 (14.4) | 216 (46.9) | 186 (40.3) | (12.8) |                  |            |            |           |            |            |           |     |    |    |   |
|                       |               |                |          |            |            |           |            |            | 58     |                  |            |            |           |            |            |           |     |    |    |   |
|                       |               |                | Rectum   | 190 (39.7) | 231 (48.2) | 58 (12.1) | 226 (47.3) | 194 (40.6) | (12.1) |                  |            |            |           |            |            |           |     |    |    |   |
|                       | Caucasian     | Healthy        |          |            |            |           |            |            | 136    |                  |            |            |           |            | 156        |           |     |    |    |   |
| Pardini, 2011 (47)    | (Czech)       | adults         | CR mixed | 317 (47.6) | 307 (46.1) | 42 (6.3)  | 613 (44.5) | 627 (45.6) | (9.9)  | Yes              | 281 (42.2) | 309 (46.4) | 76 (11.4) | 583 (42.3) | 638 (46.4) | (11.3)    | Yes | 7  | 11 | 5 |
| Karpinski, 2010 (48)  | (Poland)      | cancer         | CR mixed | 74 (39.8)  | 97 (52.2)  | 15 (8.0)  | 71 (50.7)  | 55 (39.3)  | (10.0) | Yes              |            |            |           |            |            |           |     | 8  | 5  | 5 |
|                       | Caucasian     | Adults w/o     |          |            |            | 202       |            |            | 209    |                  |            |            |           |            |            |           |     |    |    |   |
| Vossen, 2011 (49)     | (Germany)     | CR cancer      | CR mixed | 737 (41.8) | 823 (46.7) | (11.5)    | 795 (43.9) | 807 (44.6) | (11.5) | Yes              |            |            |           |            |            |           |     | 10 | 7  | 6 |
| Plaschke, 2002 (50)   | (Germany)     | adults         | CR mixed | 133 (46.3) | 120 (41.8) | 34 (11.9) | 149 (43.1) | 159 (46.0) | (10.9) | Yes              | 134 (46.7) | 124 (43.2) | 29 (10.1) | 154 (44.5) | 151 (43.6) | (11.9)    | Yes | 5  | 5  | 5 |
|                       | Caucasian     | Adults w/o     |          |            |            | 136       |            |            | 149    |                  |            |            | 107       |            |            |           |     |    |    |   |
| Küry, 2008 (51)       | (France)      | CR cancer      | CR mixed | 435 (42.5) | 452 (44.2) | (13.3)    | 457 (40.8) | 515 (45.9) | (13.3) | Yes              | 484 (47.3) | 432 (42.2) | (10.5)    | 577 (51.5) | 443 (39.5) | 101 (9.0) | Yes | 8  | 7  | 5 |
| DeVogel, 2009 (52)    | (Netherlands) | adults         | CR mixed | 318 (46.2) | 320 (46.4) | 51 (7.4)  | 876 (48.9) | 750 (41.8) | (9.3)  | Yes              | 299 (43.7) | 275 (40.2) | (16.1)    | 735 (41.6) | 774 (43.8) | (14.6)    | No  | 8  | 10 | 6 |
|                       |               |                |          |            |            |           |            |            | 87     |                  |            |            |           |            |            |           |     |    |    |   |
|                       |               |                | Male     | 179 (46.8) | 184 (48.2) | 19 (5.0)  | 409 (45.4) | 405 (44.9) | (9.6)  |                  | 167 (43.8) | 166 (43.6) | 48 (12.6) | 345 (39.3) | 423 (48.2) | (12.5)    |     |    |    |   |
|                       |               |                |          |            |            |           |            |            | 80     |                  |            |            |           |            |            |           |     |    |    |   |
|                       |               |                | Female   | 139 (45.3) | 136 (44.3) | 32 (10.4) | 467 (52.3) | 345 (38.7) | (9.0)  |                  | 132 (43.6) | 109 (36.0) | 62 (20.4) | 390 (43.9) | 351 (39.5) | (16.6)    |     |    |    |   |
| Heijmans, 2003 (53)   | (Netherlands) | cancer         | CR mixed | 7 (38.9)   | 7 (38.9)   | 4 (22.2)  | 399 (50.3) | 329 (41.5) | (8.2)  | Yes              |            |            |           |            |            |           |     | 7  | 10 | 6 |
| Wettergren, 2010 (54) | (Sweden)      | adults         | CR mixed | 81 (46.3)  | 76 (43.4)  | 18 (10.3) | 167 (55.9) | 107 (35.8) | (8.3)  | Yes              |            |            |           |            |            |           |     | 10 | 6  | 5 |
| Derwinger, 2009 (55)  | (Sweden)      | adults         | CR mixed | 273 (50.2) | 216 (39.7) | 55 (10.1) | 167 (55.9) | 107 (35.8) | (8.3)  | Yes <sup>4</sup> |            |            |           |            |            |           |     | 7  | 11 | 6 |





|                   |                  |            |          |            |            |           |            |            |         |                 |            |            |           |            |            |           |                 |    |   |   |
|-------------------|------------------|------------|----------|------------|------------|-----------|------------|------------|---------|-----------------|------------|------------|-----------|------------|------------|-----------|-----------------|----|---|---|
|                   |                  | Adults w/o |          |            |            |           |            |            | 227     |                 |            |            |           |            |            | 216       |                 |    |   |   |
| Curtin, 2004 (80) | Mixed (US)       | CR cancer  | Colon    | 734 (45.7) | 724 (45.0) | 150 (9.3) | 887 (45.0) | 858 (43.5) | (11.5)  | Yes             | 757 (47.1) | 698 (43.4) | 153 (9.5) | 929 (47.1) | 827 (41.9) | (11.0)    | Yes             | 8  | 7 | 6 |
|                   |                  |            |          |            |            |           |            |            | 123     |                 |            |            |           |            |            |           |                 |    |   |   |
|                   |                  |            | Male     | 402 (45.1) | 412 (46.2) | 78 (8.7)  | 465 (44.8) | 451 (43.4) | (11.8)  |                 | 420 (47.1) | 379 (42.5) | 93 (10.4) | 504 (48.5) | 432 (41.6) | 103 (9.9) |                 |    |   |   |
|                   |                  |            |          |            |            |           |            |            | 103     |                 |            |            |           |            |            | 113       |                 |    |   |   |
|                   |                  |            | Female   | 327 (46.5) | 305 (43.4) | 71 (10.1) | 421 (45.5) | 401 (43.4) | (11.1)  |                 | 331 (47.1) | 312 (44.4) | 60 (8.5)  | 422 (45.6) | 390 (42.2) | (12.2)    |                 |    |   |   |
|                   |                  | Adults w/o |          |            |            |           |            |            | 49      |                 |            |            |           |            |            |           |                 |    |   |   |
| Ma, 1997 (81)     | Mixed (US)       | CR cancer  | CR mixed | 92 (45.5)  | 92 (45.5)  | 18 (9.0)  | 145 (44.5) | 132 (40.5) | (15.0)  | No <sup>4</sup> |            |            |           |            |            |           |                 | 7  | 9 | 6 |
| Gallegos-Arreola, | Hispanic         | Healthy    |          |            |            | 119       |            |            | 32      |                 |            |            |           |            |            |           |                 |    |   |   |
| 2009 (82)         | (Mexico)         | adults     | CR mixed | 124 (33.6) | 126 (34.1) | (32.3)    | 59 (34.7)  | 79 (46.5)  | (18.8)  | Yes             |            |            |           |            |            |           |                 | 7  | 4 | 4 |
| Delgado-Enciso,   | Hispanic         |            |          |            |            |           |            |            | 24      |                 |            |            |           |            |            |           |                 |    |   |   |
| 2001 (83)         | (Mexico)         | -          | CR mixed | 15 (20.3)  | 42 (56.7)  | 17 (23.0) | 34 (30.9)  | 52 (47.3)  | (21.8)  | Yes             |            |            |           |            |            |           |                 | 5  | 7 | 3 |
| South America     |                  |            |          |            |            |           |            |            |         |                 |            |            |           |            |            |           |                 |    |   |   |
| Guimarães, 2011   |                  | Healthy    |          |            |            |           |            |            | 17      |                 |            |            | 8         |            |            |           |                 |    |   |   |
| (84)              | Mixed (Brazil)   | adults     | CR mixed | 48 (42.5)  | 50 (44.2)  | 15 (13.3) | 92 (48.9)  | 79 (42.0)  | (9.1)   | Yes             | 67 (59.3)  | 38 (33.6)  | (7.1)     | 127 (67.5) | 49 (26.1)  | 12 (6.4)  | No <sup>4</sup> | 9  | 6 | 5 |
|                   |                  | Healthy    |          |            |            |           |            |            | 30      |                 |            |            | 6         |            |            |           |                 |    |   |   |
| Lima, 2007 (85)   | Mixed (Brazil)   | adults     | CR each  | 41 (40.2)  | 46 (45.1)  | 15 (14.7) | 143 (47.7) | 127 (42.3) | (10.0)  | Yes             | 68 (66.7)  | 28 (27.4)  | (5.9)     | 191 (63.7) | 93 (31.0)  | 16 (5.3)  | Yes             | 8  | 5 | 6 |
|                   |                  |            | Colon    | 40 (40.4)  | 44 (44.4)  | 15 (15.2) | 67 (67.7)  | 26 (26.3)  | 6 (6.1) |                 |            |            |           |            |            |           |                 |    |   |   |
|                   |                  |            | Rectum   | 1 (33.3)   | 2 (67.7)   | 0 (0)     | 1 (33.3)   | 2 (67.7)   | 0 (0)   |                 |            |            |           |            |            |           |                 |    |   |   |
|                   |                  |            | Proximal | 12 (38.7)  | 15 (48.4)  | 4 (12.9)  | 23 (74.2)  | 7 (22.6)   | 1 (3.2) |                 |            |            |           |            |            |           |                 |    |   |   |
|                   |                  |            | Distal   | 28 (41.2)  | 29 (42.6)  | 11 (16.2) | 44 (64.7)  | 19 (27.9)  | 5 (7.4) |                 |            |            |           |            |            |           |                 |    |   |   |
|                   |                  |            | Male     | 26 (47.3)  | 22 (40.0)  | 7 (12.7)  | 37 (67.3)  | 14 (25.4)  | 4 (7.3) |                 |            |            |           |            |            |           |                 |    |   |   |
|                   |                  |            | Female   | 15 (31.9)  | 24 (51.1)  | 8 (17.0)  | 31 (66.0)  | 14 (29.8)  | 2 (4.2) |                 |            |            |           |            |            |           |                 |    |   |   |
|                   | Caucasian        |            |          |            |            |           |            |            | 5       |                 |            |            |           |            |            |           |                 |    |   |   |
|                   | (Brazil)         |            |          | 36 (40)    | 40 (44.4)  | 14 (15.6) | 61 (67.8)  | 24 (26.7)  | (5.5)   |                 |            |            |           |            |            |           |                 |    |   |   |
|                   |                  |            |          | 4          | 5          | 1         | 5          | 4          | 1       |                 |            |            |           |            |            |           |                 |    |   |   |
|                   | African (Brazil) |            |          | (40)       | (50)       | (10)      | (50)       | (40)       | (10)    |                 |            |            |           |            |            |           |                 |    |   |   |
| Asia              |                  |            |          |            |            |           |            |            |         |                 |            |            |           |            |            |           |                 |    |   |   |
|                   |                  | Adults w/o |          |            |            |           |            |            | 134     |                 |            |            | 9         |            |            |           |                 |    |   |   |
| Matsuo, 2005 (86) | Asian (Japan)    | cancer     | CR mixed | 106 (41.4) | 114 (44.5) | 36 (14.1) | 289 (37.5) | 348 (45.1) | (17.4)  | Yes             | 163 (63.4) | 85 (33.1)  | (3.5)     | 479 (62.5) | 257 (33.5) | 31 (4.0)  | Yes             | 9  | 9 | 6 |
|                   |                  | Adults w/o |          |            |            |           |            |            | 57      |                 |            |            | 1         |            |            |           |                 |    |   |   |
| Otani, 2005 (87)  | Asian (Japan)    | cancer     | CR mixed | 32 (30.2)  | 49 (46.2)  | 25 (23.6) | 51 (23.0)  | 114 (51.3) | (25.7)  | Yes             | 73 (68.9)  | 32 (30.2)  | (0.9)     | 156 (69.7) | 63 (28.1)  | 5 (2.2)   | Yes             | 8  | 8 | 6 |
|                   |                  | Adults w/o |          |            |            |           |            |            | 133     |                 |            |            |           |            |            |           |                 |    |   |   |
| Yin, 2004 (88)    | Asian (Japan)    | CR cancer  | CR each  | 270 (39.4) | 330 (48.2) | 85 (12.4) | 278 (35.7) | 367 (47.2) | (17.1)  | Yes             | 438 (64.0) | 220 (32.1) | 27 (3.9)  | 515 (66.2) | 244 (31.4) | 19 (2.4)  | Yes             | 10 | 4 | 6 |
|                   |                  |            | Colon    | 154 (40.3) | 180 (47.1) | 48 (12.6) |            |            |         |                 | 236 (61.8) | 128 (33.5) | 18 (4.7)  |            |            |           |                 |    |   |   |
|                   |                  |            | Rectum   | 110 (37.9) | 144 (49.7) | 36 (12.4) |            |            |         |                 | 192 (66.2) | 90 (31.0)  | 8 (2.8)   |            |            |           |                 |    |   |   |
|                   |                  |            | Proximal | 59 (39.3)  | 75 (50.0)  | 16 (10.7) |            |            |         |                 | 96 (64.0)  | 47 (31.3)  | 7 (4.7)   |            |            |           |                 |    |   |   |
|                   |                  |            | Distal   | 95 (40.9)  | 105 (45.3) | 32 (13.8) |            |            |         |                 | 140 (60.3) | 81 (34.9)  | 11 (4.7)  |            |            |           |                 |    |   |   |
| Matsuo, 2002 (89) | Asian (Japan)    | Adults w/o | CR each  | 39 (27.5)  | 81 (57.0)  | 22 (15.5) | 81 (33.6)  | 124 (51.5) | 36      | Yes             | 94 (66.7)  | 44 (31.2)  | 3         | 157 (65.2) | 75 (31.1)  | 9 (3.7)   | Yes             | 8  | 5 | 6 |

|                  |                |                |          |            |            |           |            |            |        |                  |            |            |          |            |            |          |                 |   |           |   |
|------------------|----------------|----------------|----------|------------|------------|-----------|------------|------------|--------|------------------|------------|------------|----------|------------|------------|----------|-----------------|---|-----------|---|
|                  |                | cancer         |          |            |            |           |            |            | (14.9) |                  |            |            | (2.1)    |            |            |          |                 |   |           |   |
|                  |                |                | Colon    | 23 (31.9)  | 39 (54.2)  | 10 (13.9) |            |            |        |                  | 50 (69.4)  | 19 (26.4)  | 3 (4.2)  |            |            |          |                 |   |           |   |
|                  |                |                | Rectum   | 16 (22.9)  | 42 (60.0)  | 12 (17.1) |            |            |        |                  | 44 (63.8)  | 25 (36.2)  | 0 (0)    |            |            |          |                 |   |           |   |
|                  |                | Adults w/o     |          |            |            |           |            |            | 129    |                  |            |            | 162      |            |            |          |                 |   |           |   |
| Kim, 2012 (90)   | Asian (Korea)  | cancer         | CR each  | 265 (33.7) | 393 (49.9) | (16.4)    | 205 (31.3) | 289 (44.1) | (24.7) | No               |            |            |          |            |            |          | 7               | 9 | 6         |   |
|                  |                |                | Colon    | 121 (33.3) | 185 (51.0) | 57 (15.7) |            |            |        |                  |            |            |          |            |            |          |                 |   |           |   |
|                  |                |                | Rectum   | 109 (33.0) | 164 (49.7) | 57 (17.3) |            |            |        |                  |            |            |          |            |            |          |                 |   |           |   |
|                  |                | Adults w/o     |          |            |            |           |            |            | 17     |                  |            |            | 1        | 36         |            |          |                 |   |           |   |
| Kim, 2011 (91)   | Asian (Korea)  | cancer         | CR mixed | 30 (44.8)  | 30 (44.8)  | 7 (10.4)  | 15 (28.3)  | 21 (39.6)  | (32.1) | Yes              | 44 (65.7)  | 22 (32.8)  | (1.5)    | (67.9)     | 16 (30.2)  | 1 (1.9)  | Yes             | 9 | 5         | 5 |
|                  |                | Healthy        |          |            |            |           |            |            | 65     |                  |            |            |          |            |            |          |                 |   | 16        |   |
| Kang, 2011 (92)  | Asian (Korea)  | adults         | CR mixed | 87 (34.1)  | 134 (52.6) | 34 (13.3) | 145 (32.4) | 238 (53.1) | (14.5) | No <sup>4</sup>  |            |            |          |            |            |          |                 |   | (5, 5, 6) |   |
|                  |                |                | Male     | 46 (32.2)  | 81 (56.6)  | 16 (11.2) |            |            |        |                  |            |            |          |            |            |          |                 |   |           |   |
|                  |                |                | Female   | 41 (36.6)  | 53 (47.3)  | 18 (16.1) |            |            |        |                  |            |            |          |            |            |          |                 |   |           |   |
|                  |                | Adults w/other |          |            |            |           |            |            | 284    |                  |            |            | 297      |            |            |          |                 |   |           |   |
| Cui, 2010 (93)   | Asian (Korea)  | conditions     | CR mixed | 622 (34.0) | 923 (50.5) | (15.5)    | 540 (31.8) | 863 (50.7) | (17.5) | Yes              |            |            |          |            |            |          | 7               | 7 | 6         |   |
|                  |                | Healthy        |          |            |            |           |            |            | 74     |                  |            |            |          |            |            |          |                 |   |           |   |
| Park, 1999 (94)  | Asian (Korea)  | adults         | CR mixed | 65 (32.5)  | 107 (53.5) | 28 (14.0) | 140 (30.4) | 246 (53.5) | (16.1) | No <sup>4</sup>  |            |            |          |            |            |          | 7               | 4 | 6         |   |
|                  |                |                | Male     | 39 (38.2)  | 52 (51.0)  | 11 (10.8) |            |            |        |                  |            |            |          |            |            |          |                 |   |           |   |
|                  |                |                | Female   | 26 (26.5)  | 55 (56.1)  | 17 (17.4) |            |            |        |                  |            |            |          |            |            |          |                 |   |           |   |
| Chang, 2007 (95) | Asian (Taiwan) | adults         | CR mixed | 85 (43.6)  | 86 (44.1)  | 24 (12.3) | 92 (47.2)  | 87 (44.6)  | (8.2)  | Yes              | 120 (61.6) | 65 (33.3)  | 10 (5.1) | 127 (65.1) | 55 (28.2)  | 13 (6.7) | No <sup>4</sup> | 9 | 8         | 5 |
|                  |                | Healthy        |          |            |            |           |            |            | 53     |                  |            |            |          |            |            |          |                 |   |           |   |
| Yin, 2012 (96)   | Asian (Chi)    | adults         | CR mixed | 124 (33.5) | 167 (45.1) | 79 (21.4) | 139 (37.6) | 178 (48.1) | (14.3) | Yes <sup>4</sup> |            |            |          |            |            |          | 7               | 6 | 5         |   |
|                  |                | Adults w/o     |          |            |            |           |            |            | 26     |                  |            |            | 2        |            |            |          |                 |   |           |   |
| Li, 2011 (97)    | Asian (Chi)    | cancer         | CR mixed | 68 (49.6)  | 54 (39.4)  | 15 (10.9) | 55 (37.9)  | 64 (44.2)  | (17.9) | Yes              | 88 (64.2)  | 47 (34.3)  | (1.5)    | 76 (52.4)  | 60 (41.4)  | 9 (6.2)  | Yes             | 7 | 5         | 6 |
|                  |                | Healthy        |          |            |            |           |            |            | 10     |                  |            |            |          |            |            |          |                 |   |           |   |
| Zhu, 2011 (98)   | Asian (Chi)    | adults         | CR mixed | 29 (33.7)  | 42 (48.8)  | 15 (17.4) | 49 (49.0)  | 41 (41.0)  | (10.0) | Yes              |            |            |          |            |            |          | 8               | 6 | 6         |   |
|                  |                |                | Male     | 16 (32.0)  | 24 (48.0)  | 10 (20.0) |            |            |        |                  |            |            |          |            |            |          |                 |   |           |   |
|                  |                |                | Female   | 13 (36.1)  | 18 (50.0)  | 5 (13.9)  |            |            |        |                  |            |            |          |            |            |          |                 |   |           |   |
|                  |                | Healthy        |          |            |            |           |            |            | 66     |                  |            |            | 6        |            |            |          |                 |   |           |   |
| Cao, 2008 (99)   | Asian (Chi)    | adults         | CR each  | 109 (34.6) | 154 (48.9) | 52 (16.5) | 121 (32.7) | 183 (49.5) | (17.8) | Yes              | 204 (64.8) | 105 (33.3) | (1.9)    | 239 (64.4) | 119 (32.1) | 13 (3.5) | Yes             | 8 | 6         | 6 |
|                  |                |                |          |            |            |           |            |            | 33     |                  |            |            |          |            |            |          |                 |   |           |   |
|                  |                |                | Male     | 67 (35.3)  | 95 (50.0)  | 28 (14.7) | 72 (32.3)  | 118 (52.9) | (14.8) |                  | 124 (65.3) | 62 (32.6)  | 4 (2.1)  | 138 (61.9) | 77 (34.5)  | 8 (3.6)  |                 |   |           |   |
|                  |                |                |          |            |            |           |            |            | 33     |                  |            |            |          |            |            |          |                 |   |           |   |
|                  |                |                | Female   | 42 (33.6)  | 59 (47.2)  | 24 (19.2) | 49 (33.3)  | 65 (44.2)  | (22.5) |                  | 80 (64.0)  | 43 (34.4)  | 2 (1.6)  | 101 (68.2) | 42 (28.4)  | 5 (3.4)  |                 |   |           |   |
|                  |                |                | Colon    | 30 (28.6)  | 53 (50.5)  | 22 (20.9) |            |            |        |                  | 66 (62.9)  | 38 (36.2)  | 1 (1.0)  |            |            |          |                 |   |           |   |
|                  |                |                | Male     | 18 (27.7)  | 31 (47.7)  | 16 (24.6) |            |            |        |                  | 39 (60.0)  | 25 (38.5)  | 1 (1.5)  |            |            |          |                 |   |           |   |



|                |       |       |            |                   |           |            |           |         |           |           |         |                  |           |           |          |        |         |                 |                  |   |    |   |
|----------------|-------|-------|------------|-------------------|-----------|------------|-----------|---------|-----------|-----------|---------|------------------|-----------|-----------|----------|--------|---------|-----------------|------------------|---|----|---|
|                |       |       |            | Female            | 12 (30.0) | 22 (55.0)  | 6 (15.0)  |         |           |           |         | 27 (67.5)        | 13 (32.5) | 0 (0)     |          |        |         |                 |                  |   |    |   |
|                |       |       |            | Rectum            | 79 (37.6) | 101 (48.1) | 30 (14.3) |         |           |           |         | 138 (65.7)       | 67 (31.9) | 5 (2.4)   |          |        |         |                 |                  |   |    |   |
|                |       |       |            | Male              | 49 (39.2) | 64 (51.2)  | 12 (9.6)  |         |           |           |         | 85 (68.0)        | 37 (29.6) | 3 (2.4)   |          |        |         |                 |                  |   |    |   |
|                |       |       |            | Female            | 30 (35.3) | 37 (43.5)  | 18 (21.2) |         |           |           |         | 53 (62.4)        | 30 (35.3) | 2 (2.4)   |          |        |         |                 |                  |   |    |   |
| Zhang, 2008    |       |       |            | Adults w/o        |           | 136        | 67        | 91      | 139       | 69        |         | 189              | 93        |           | 196      | 89     | 15      |                 |                  |   |    |   |
| (100)          | Asian | (Chi) | cancer     | CR mixed          | 97 (32.3) | (45.3)     | (22.3)    | (30.4)  | (46.5)    | (23.1)    | Yes     | (63.2)           | (31.1)    | 17 (5.7)  | (65.3)   | (29.7) | (5.0)   | Yes             | 7                | 7 | 6  |   |
|                |       |       |            | Healthy           |           | 182        | 211       | 56      | 211       | 325       | 136     |                  |           |           |          |        |         |                 |                  |   |    |   |
| Jin, 2007      | (101) | Asian | (Chi)      | adults            | CR mixed  | (40.5)     | (47.0)    | (12.5)  | (31.4)    | (48.4)    | (20.2)  | Yes <sup>4</sup> |           |           |          |        |         |                 | 7                | 7 | 6  |   |
| Miao, 2005     |       |       |            | Healthy           |           | 87         | 58        | 133     | 201       | 86        |         | 147              | 48        |           | 282      | 132    |         |                 |                  |   |    |   |
| (102)          | Asian | (Chi) | adults     | CR mixed          | 53 (26.8) | (44.0)     | (29.2)    | (31.7)  | (47.8)    | (20.5)    | Yes     | (74.3)           | (24.2)    | 3 (1.5)   | (67.1)   | (31.5) | 6 (1.4) | No <sup>4</sup> | 7                | 7 | 3  |   |
|                |       |       |            | Healthy           |           | 53         | 22        | 121     | 183       | 66        |         | 66               | 38        | 1         | 239      | 119    | 13      |                 |                  |   |    |   |
| Gao, 2005      | (103) | Asian | (Chi)      | adults            | CR mixed  | 30 (28.5)  | (50.5)    | (21.0)  | (32.7)    | (49.5)    | (17.8)  | Yes <sup>4</sup> | (62.8)    | (36.2)    | (10)     | (64.4) | (32.1)  | (3.5)           | Yes <sup>4</sup> | 7 | 8  | 6 |
|                |       |       |            | Adults w/o        |           | 59         | 15        | 133     | 144       | 63        |         | 93               | 30        |           | 227      | 103    |         |                 |                  |   |    |   |
| Jiang, 2004    | (104) | Asian | (Chi)      | cancer            | CR mixed  | 51 (40.8)  | (47.2)    | (12.0)  | (39.1)    | (42.4)    | (18.5)  | No <sup>4</sup>  | (75.0)    | (24.2)    | 1 (0.8)  | (67.5) | (30.7)  | 6 (1.8)         | Yes <sup>4</sup> | 7 | 7  | 6 |
|                |       |       |            | Adults w/other    |           |            |           |         |           |           |         |                  |           |           |          |        |         |                 |                  |   |    |   |
| Promthet, 2010 | (105) | Asian | (Thailand) | health conditions | Colon     | 104 (80.0) | 26 (20.0) | 0 (0)   | 94 (72.3) | 31 (23.8) | 5 (3.9) | Yes              | (33.1)    | (64.6)    | 3 (2.3)  | (41.5) | (54.6)  | 5 (3.9)         | No               | 8 | 4  | 5 |
|                |       |       |            | Adults w/o        |           | 118        | 37        | 0       | 261       | 31        | 2       |                  | 33        | 108       |          | 158    | 129     | 7               |                  |   |    |   |
| Rai, 2014      | (106) | Asian | (India)    | cancer            | Colon     | (76.1)     | (23.9)    | (0)     | (88.8)    | (10.5)    | (0.7)   | Yes              | (22.0)    | (70.0)    | 14 (8.0) | (25.6) | (58.1)  | (16.3)          | No               | 6 | 5  | 5 |
| Prasad, 2011   | (107) | Asian | (India)    | -                 | CR mixed  | 97 (88.2)  | (10.9)    | (0.9)   | (94.6)    | 12 (5.0)  | (0.4)   | Yes              |           |           |          |        |         |                 | 4                | 5 | 6  |   |
| Sameer, 2011   | (108) | Asian | (India)    | adults            | CR mixed  | 59 (68.6)  | (20.9)    | (10.5)  | (75.6)    | (16.9)    | (7.5)   | No               |           |           |          |        |         |                 | 7                | 8 | 6  |   |
|                |       |       |            |                   |           | 10         | 5         |         |           |           |         |                  |           |           |          |        |         |                 |                  |   |    |   |
|                |       |       |            |                   | Male      | 34 (69.4)  | (20.4)    | (10.2)  |           |           |         |                  |           |           |          |        |         |                 |                  |   |    |   |
|                |       |       |            |                   |           |            |           | 4       |           |           |         |                  |           |           |          |        |         |                 |                  |   |    |   |
|                |       |       |            |                   | Female    | 25 (67.6)  | 8 (21.6)  | (10.8)  |           |           |         |                  |           |           |          |        |         |                 |                  |   |    |   |
|                |       |       |            | Family members    |           | 25         | 1         | 66      | 19        | 1         |         | 22               | 70        |           | 22       | 50     | 14      |                 |                  |   |    |   |
| Chandy, 2010   | (109) | Asian | (India)    | of patients       | CR mixed  | 74 (74.0)  | (25.0)    | (1.0)   | (76.7)    | (22.1)    | (1.2)   | Yes              | (22.0)    | (70.0)    | 8 (8.0)  | (25.6) | (58.1)  | (16.3)          | Yes              | 9 | 10 | 4 |
|                |       |       |            | Family members    |           | 257        | 43        | 2       | 255       | 36        | 0       |                  | 141       | 130       | 31       | 105    | 135     | 51              |                  |   |    |   |
| Wang, 2006     | (110) | Asian | (India)    | of patients       | CR each   | (85.1)     | (14.2)    | (0.7)   | (87.6)    | (12.4)    | (0)     | Yes              | (46.7)    | (43.0)    | (10.3)   | (36.1) | (46.4)  | (17.5)          | Yes              | 7 | 10 | 6 |
|                |       |       |            |                   |           |            |           |         |           |           |         |                  |           |           |          |        |         |                 |                  |   |    |   |
|                |       |       |            |                   | Colon     | 53 (89.8)  | 6 (10.2)  | 0 (0)   |           |           |         |                  | 32 (54.2) | 22 (37.3) |          |        |         |                 | 5 (8.5)          |   |    |   |
|                |       |       |            |                   |           | 204        | 37        |         |           |           |         |                  | 109       | 108       | 26       |        |         |                 |                  |   |    |   |
|                |       |       |            |                   | Rectum    | (83.9)     | (30.3)    | 2 (0.8) |           |           |         |                  | (44.9)    | (44.4)    | (10.7)   |        |         |                 |                  |   |    |   |

|                                |                         |                      |          |            |           |             |            |            |              |     |           |           |           |           |              |              |     |   |   |   |
|--------------------------------|-------------------------|----------------------|----------|------------|-----------|-------------|------------|------------|--------------|-----|-----------|-----------|-----------|-----------|--------------|--------------|-----|---|---|---|
| Naghbalhossaini,<br>2010 (111) | Mid-Eastern<br>(Iran)   | Healthy<br>adults    | Colon    | 64 (42.4)  | 80 (53.0) | 7<br>(4.6)  | 150 (64.9) | 68 (29.5)  | 13<br>(5.6)  | Yes | 38 (37.2) | 52 (51.0) | 12 (11.8) | 79 (42.5) | 85<br>(45.7) | 22<br>(11.8) | Yes | 7 | 5 | 6 |
|                                |                         |                      | Male     | 33 (36.7)  | 51 (56.7) | 6 (6.7)     | 87 (62.1)  | 46 (32.9)  | 7 (5.0)      |     | 26 (38.2) | 41 (60.3) | 1 (1.5)   | 48 (41.0) | 60 (51.3)    | 9 (7.7)      |     |   |   |   |
|                                |                         |                      | Female   | 31 (50.8)  | 29 (47.5) | 1 (1.6)     | 63 (69.2)  | 22 (24.2)  | 6 (6.6)      |     | 12 (35.3) | 11 (32.4) | 11 (32.4) | 31 (44.9) | 25 (36.2)    | 13 (18.8)    |     |   |   |   |
|                                |                         |                      | Proximal | 22 (36.7)  | 37 (61.7) | 1 (1.7)     |            |            |              |     | 6 (36.7)  | 16 (61.7) | 7 (1.7)   |           |              |              |     |   |   |   |
|                                |                         |                      | Distal   | 42 (46.2)  | 43 (47.3) | 6 (6.6)     |            |            |              |     | 32 (46.2) | 36 (47.3) | 5 (6.6)   |           |              |              |     |   |   |   |
|                                |                         | Adults<br>w/other    |          |            |           |             |            |            |              |     |           |           |           |           |              |              |     |   |   |   |
| Haghighi, 2008<br>(112)        | Mid-Eastern<br>(Iran)   | health<br>conditions | CR mixed | 117 (50.0) | 68 (29.1) | 49 (20.9)   | 76 (29.6)  | 118 (45.9) | 63<br>(24.5) | Yes |           |           |           |           |              |              |     | 7 | 8 | 6 |
|                                | Mid-Eastern             | Healthy              |          | 79         | 45        | 4           | 59         | 45         | 12           |     | 51        | 59        | 21        | 43        | 58           | 14           |     |   |   |   |
| Yousef, 2013 (113)             | (Jordan)                | adults               | CR mixed | (62)       | (35)      | (3)         | (51)       | (39)       | (10)         | Yes | (39)      | (45)      | (16)      | (37)      | (50)         | (12)         | Yes | 9 | 8 | 6 |
| Zeybek, 2006<br>(114)          | Mid-Eastern<br>(Turkey) | Adults w/o<br>cancer | CR mixed | 18 (34.6)  | 27 (51.9) | 7<br>(13.5) | 64 (44.4)  | 65 (45.1)  | 15<br>(10.4) | Yes |           |           |           |           |              |              |     | 7 | 6 | 5 |
| Africa                         |                         |                      |          |            |           |             |            |            |              |     |           |           |           |           |              |              |     |   |   |   |
| El Awady, 2009<br>(115)        | African (Egypt)         | Adults w/o<br>cancer | CR mixed | 6 (17.1)   | 23 (65.8) | 6<br>(17.1) | 44 (64.7)  | 20 (29.4)  | 6<br>(5.9)   | Yes | 5 (14.3)  | 21 (60.0) | 9 (25.7)  | 26 (38.2) | 37 (54.4)    | 5 (7.4)      | Yes | 6 | 8 | 5 |

Note. C = colon; HWE = Hardy-Weinberg equilibrium; R = rectum.

<sup>1</sup>Reference numbers refer to the Reference List that follows this table.

<sup>2</sup>Quality score ranges: Total score 0–29; external validity 0–11; internal validity 0–12; report quality 0–6.

<sup>3</sup>10 European Countries: Denmark, France, Greece, Germany, Italy, Netherlands, Norway, Spain, Sweden, United Kingdom.

<sup>4</sup>HWE updated from the original report based on our calculations using the formula available at <http://www.koonec.com/k-blog/2010/06/20/hardy-weinberg-equilibrium-calculator>.

Table S3a. Differences between risk ratio and odds ratio for *MTHFR* 677 genotypes for colorectal cancer (CRC). (92 studies)

| Genotype<br>(no. of<br>studies) | CRC Cases<br>(N =<br>33626)<br>n (%) | Controls<br>(N =<br>48688)<br>n (%) | Test of Heterogeneity |       |        |                | Test of Association   |                        |        |
|---------------------------------|--------------------------------------|-------------------------------------|-----------------------|-------|--------|----------------|-----------------------|------------------------|--------|
|                                 |                                      |                                     | Ratio<br>Type         | Q     | p      | I <sup>2</sup> | Statistic<br>al Model | Risk Ratio<br>(95% CI) | p      |
| TT (92)                         | (11.56)                              | (12.36)                             | Risk                  | 183.1 | <0.000 | 50.3           |                       | 0.93 (0.87 -           | 0.0172 |
|                                 |                                      |                                     |                       | 8     | 1      | %              | Random                | 0.99)                  |        |
| CT (92)                         | (44.02)                              | (42.97)                             | Odds                  | 184.1 | <0.000 | 50.6           |                       | 0.92 (0.85 -           | 0.0151 |
|                                 |                                      |                                     |                       | 9     | 1      | %              | Random                | 0.98)                  |        |
| CC (92)                         | (44.42)                              | (44.67)                             | Risk                  | 179.6 | <0.000 | 49.3           |                       | 1.02 (1.00 -           | 0.7775 |
|                                 |                                      |                                     |                       | 1     | 1      | %              | Random                | 1.05)                  |        |
| CC+CT (92)                      | (88.44)                              | (87.64)                             | Odds                  | 180.2 | <0.000 | 48.7           |                       | 1.04 (0.99 -           | 0.0017 |
|                                 |                                      |                                     |                       | 5     | 1      | %              | Random                | 1.09)                  |        |
| CC+CT (92)                      | (88.44)                              | (87.64)                             | Risk                  | 202.8 | <0.000 | 55.1           |                       | 1.00 (0.98 -           | 0.0017 |
|                                 |                                      |                                     |                       | 0     | 1      | %              | Random                | 1.03)                  |        |
| CC+CT (92)                      | (88.44)                              | (87.64)                             | Odds                  | 216.9 | <0.000 | 58.0           |                       | 1.00 (0.95 -           | 0.0017 |
|                                 |                                      |                                     |                       | 0     | 1      | %              | Random                | 1.05)                  |        |
| CC+CT (92)                      | (88.44)                              | (87.64)                             | Risk                  | 197.3 | <0.000 | 53.9           |                       | 1.01 (1.00 -           | 0.0017 |
|                                 |                                      |                                     |                       | 8     | 1      | %              | Random                | 1.02)                  |        |

|             |         |         |      |       |        |      |        |              |        |
|-------------|---------|---------|------|-------|--------|------|--------|--------------|--------|
|             |         |         |      | 195.2 | <0.000 | 50.6 |        | 1.09 (1.02 - |        |
|             |         |         | Odds | 0     | 1      | %    | Random | 1.17)        | 0.0151 |
|             | 18688   | 26938   |      | 223.4 | <0.000 | 59.3 |        | 1.00 (0.98 - |        |
| TT +CT (92) | (55.58) | (55.33) | Risk | 9     | 1      | %    | Random | 1.02)        | 0.9745 |
|             |         |         |      | 222.5 | <0.000 | 58.0 |        | 1.00 (0.95 - |        |
|             |         |         | Odds | 1     | 1      | %    | Random | 1.05)        | 0.9871 |

Table S3b. Differences between risk ratio and odds ratio for *MTHFR* 1298 genotypes for colorectal cancer (CRC). (54 studies)

| Genotype<br>(number of<br>studies) | CRC Case<br>(N =<br>16384)<br>n (%) | Control<br>(N =<br>24874)<br>n (%) | Ratio<br>Type | Test of Heterogeneity |        |                | Test of Association   |                        |        |
|------------------------------------|-------------------------------------|------------------------------------|---------------|-----------------------|--------|----------------|-----------------------|------------------------|--------|
|                                    |                                     |                                    |               | Q                     | p      | I <sup>2</sup> | Statistic<br>al Model | Risk Ratio<br>(95% CI) | p      |
|                                    |                                     |                                    |               | 183.1                 | <0.000 | 50.3           |                       | 0.93 (0.87 -           |        |
| CC (54)                            | 1439 (8.78)                         | 2332 (9.38)                        | Risk          | 8                     | 1      | %              | Random                | 0.99)                  | 0.0172 |
|                                    |                                     |                                    |               | 184.1                 | <0.000 | 50.6           |                       | 0.92 (0.85 -           |        |
|                                    |                                     |                                    | Odds          | 9                     | 1      | %              | Random                | 0.98)                  | 0.0151 |
|                                    | 6792                                | 10059                              |               | 179.6                 | <0.000 | 49.3           |                       | 1.02 (1.00 -           |        |
| AC (54)                            | (41.46)                             | (40.44)                            | Risk          | 1                     | 1      | %              | Random                | 1.05)                  | 0.0952 |
|                                    |                                     |                                    | Odds          | 180.2                 | <0.000 | 48.7           | Random                | 1.04 (0.99 -           | 0.0998 |

|             |         |         |      |       |        |      |        |              |        |
|-------------|---------|---------|------|-------|--------|------|--------|--------------|--------|
|             |         |         |      | 5     | 1      | %    |        | 1.09)        |        |
|             | 8136    | 12483   |      | 202.8 | <0.000 | 55.1 |        | 1.00 (0.98 - |        |
| AA (54)     | (49.66) | (50.18) | Risk | 0     | 1      | %    | Random | 1.03)        | 0.7775 |
|             |         |         |      | 216.9 | <0.000 | 58.0 |        | 1.00 (0.95 - |        |
|             |         |         | Odds | 0     | 1      | %    | Random | 1.05)        | 0.9871 |
|             | 14928   | 22542   |      | 197.3 | <0.000 | 53.9 |        | 1.01 (1.00 - |        |
| AA+AC (54)  | (91.11) | (90.62) | Risk | 8     | 1      | %    | Random | 1.02)        | 0.0017 |
|             |         |         |      | 195.2 | <0.000 | 50.6 |        | 1.09 (1.02 - |        |
|             |         |         | Odds | 0     | 1      | %    | Random | 1.17)        | 0.0151 |
|             | 8231    | 12391   |      | 223.4 | <0.000 | 59.3 |        | 1.00 (0.98 - |        |
| CC +AC (54) | (55.58) | (49.82) | Risk | 9     | 1      | %    | Random | 1.02)        | 0.9745 |
|             |         |         |      | 222.5 | <0.000 | 58.0 |        | 1.00 (0.95 - |        |
|             |         |         | Odds | 1     | 1      | %    | Random | 1.05)        | 0.9871 |

---

Table S4. Meta-prediction: Death from air pollution (AP Death) on *MTHFR* 1209 genotypes for controls (ct) and colorectal cancer cases (CRC), and CRC risk.

| Variable | Partition Tree |       |             |        |        | Tukey Test      |            |       |          |          |          |
|----------|----------------|-------|-------------|--------|--------|-----------------|------------|-------|----------|----------|----------|
|          | AICc           | AP    | Death count | Mean   | SD     | Levels Compared | Difference | SE    | Lower CI | Upper CI | <i>p</i> |
| CC%ct    | 363.077        | 2 & 3 | 33          | 30.453 | 5.56   | 2/4             | 3.438      | 1.732 | -0.742   | 7.618    | 0.126    |
|          |                | 4     | 21          | 24.156 | 5.769  | 3/4             | 2.932      | 1.360 | -0.351   | 6.216    | 0.089    |
|          |                |       |             |        |        | 2/3             | 0.505      | 1.707 | -3.616   | 4.626    | 0.953    |
| CC%ca    | 349.494        | 2 & 3 | 33          | 9.324  | 6.261  | 3/4             | 3.230      | 1.800 | -1.114   | 7.575    | 0.182    |
|          |                | 4     | 21          | 6.189  | 5.289  | 2/4             | 2.917      | 2.291 | -2.613   | 8.447    | 0.417    |
|          |                |       |             |        |        | 3/2             | 0.313      | 2.259 | -5.139   | 5.765    | 0.990    |
| AC%ct    | 364.824        | 2 & 3 | 33          | 42.281 | 7.122  | 2/4             | 7.203      | 2.636 | 0.840    | 13.566   | 0.023    |
|          |                | 4     | 21          | 35.859 | 6.271  | 3/4             | 6.082      | 2.071 | 1.084    | 11.081   | 0.014    |
|          |                |       |             |        |        | 2/3             | 1.120      | 2.599 | -5.153   | 7.394    | 0.903    |
| AC%ca    | 395.392        | 2 & 3 | 33          | 44.625 | 10.266 | 2/4             | 12.595     | 3.420 | 4.339    | 20.851   | 0.002    |
|          |                | 4     | 21          | 35.788 | 6.601  | 3/4             | 7.205      | 2.687 | 0.719    | 13.690   | 0.026    |
|          |                |       |             |        |        | 2/3             | 5.390      | 3.372 | -2.749   | 13.530   | 0.256    |
| AA%ct    | 402.407        | 2 & 3 | 33          | 48.407 | 9.494  | 4/2             | 10.641     | 3.733 | 1.630    | 19.652   | 0.017    |
|          |                | 4     | 21          | 57.914 | 9.869  | 4/3             | 9.015      | 2.932 | 1.936    | 16.094   | 0.009    |
|          |                |       |             |        |        | 3/2             | 1.626      | 3.680 | -7.258   | 10.509   | 0.898    |
| AA%ca    | 423.32         | 2 & 3 | 33          | 45.07  | 12.305 | 4/2             | 15.479     | 4.481 | 4.663    | 26.295   | 0.003    |

|       |         |       |    |       |        |     |        |       |        |        |       |
|-------|---------|-------|----|-------|--------|-----|--------|-------|--------|--------|-------|
|       |         | 4     | 21 | 57.99 | 10.661 | 4/3 | 10.372 | 3.520 | 1.875  | 18.869 | 0.013 |
|       |         |       |    |       |        | 3/2 | 5.107  | 4.417 | -5.557 | 15.770 | 0.485 |
| RR8CC | 132.705 | 2     | 10 | 1.203 | 0.947  | 2/3 | 0.152  | 0.303 | -0.581 | 0.884  | 0.871 |
|       |         | 3 & 4 | 44 | 1.065 | 0.757  | 2/4 | 0.123  | 0.308 | -0.620 | 0.866  | 0.916 |
|       |         |       |    |       |        | 4/3 | 0.029  | 0.242 | -0.554 | 0.613  | 0.992 |
| RR8AC | -58.959 | 2     | 10 | 1.121 | 0.211  | 2/4 | 0.116  | 0.052 | -0.009 | 0.242  | 0.075 |
|       |         | 3 & 4 | 44 | 1.015 | 0.112  | 2/3 | 0.096  | 0.051 | -0.028 | 0.220  | 0.160 |
|       |         |       |    |       |        | 3/4 | 0.021  | 0.041 | -0.078 | 0.120  | 0.867 |
| RR8AA | -45.118 | 2     | 10 | 0.911 | 0.233  | 4/2 | 0.093  | 0.059 | -0.049 | 0.236  | 0.263 |
|       |         | 3 & 4 | 44 | 0.985 | 0.129  | 3/2 | 0.057  | 0.058 | -0.083 | 0.198  | 0.590 |
|       |         |       |    |       |        | 4/3 | 0.036  | 0.046 | -0.076 | 0.148  | 0.719 |

---

*Note.* AICc = Akaike's information criterion correction; AP death = death rates from air pollution, levels per million (2 = 50–100, 3 = 100–250, 4 = 250–400 and greater); RR = risk ratio.
