# Supplementary material
Source: PubMed Central journal article supplement (PMC4904378)

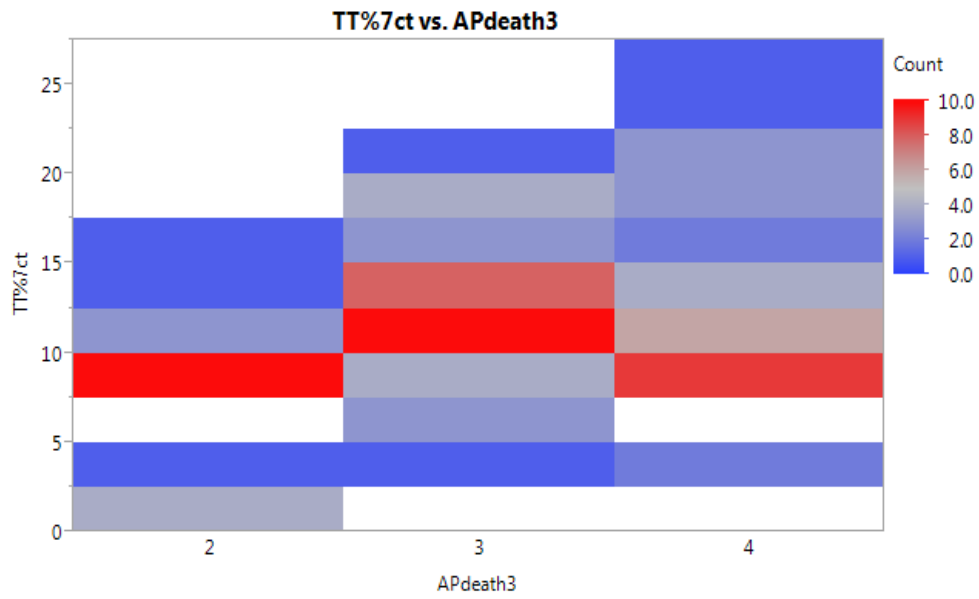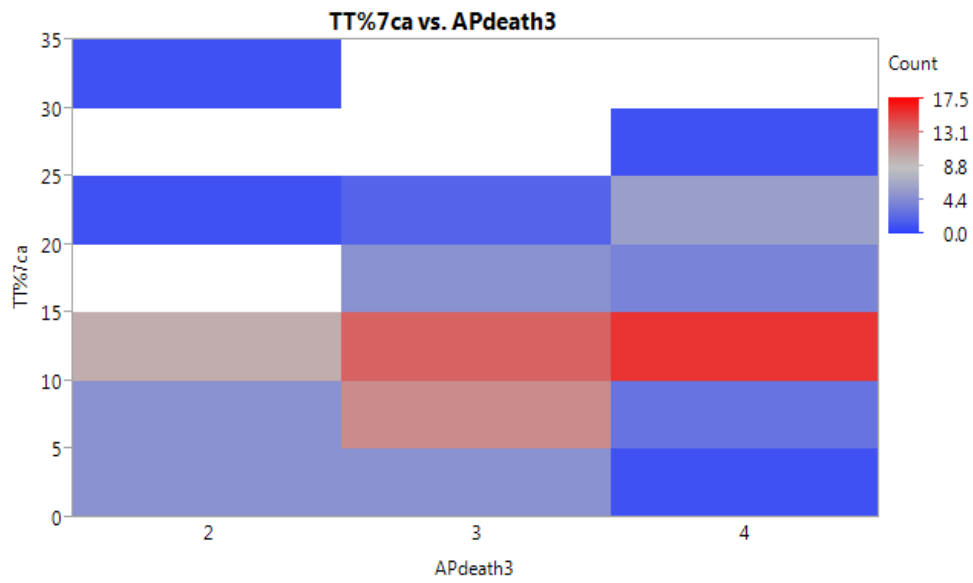

Figure S15.

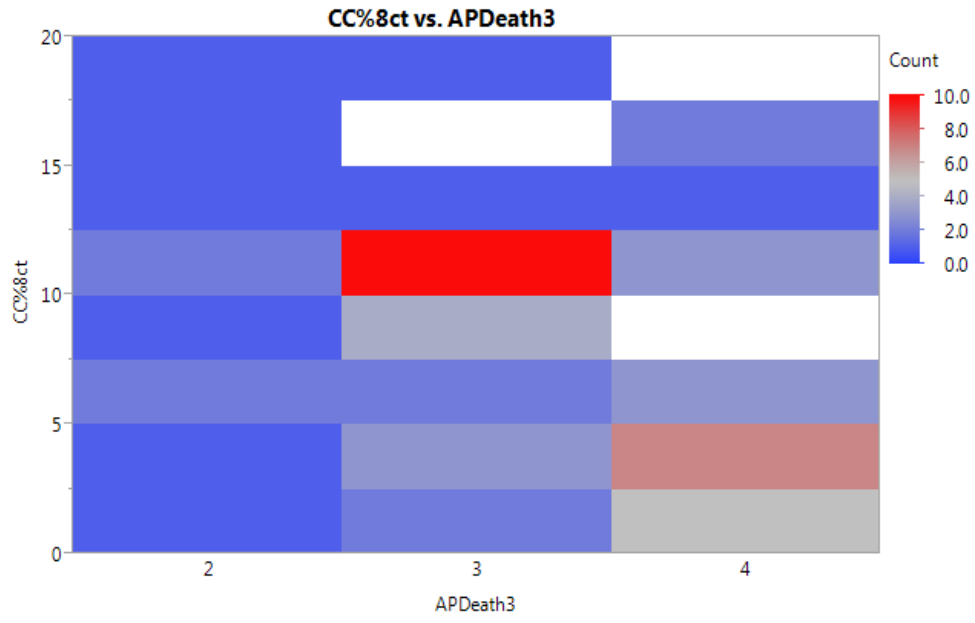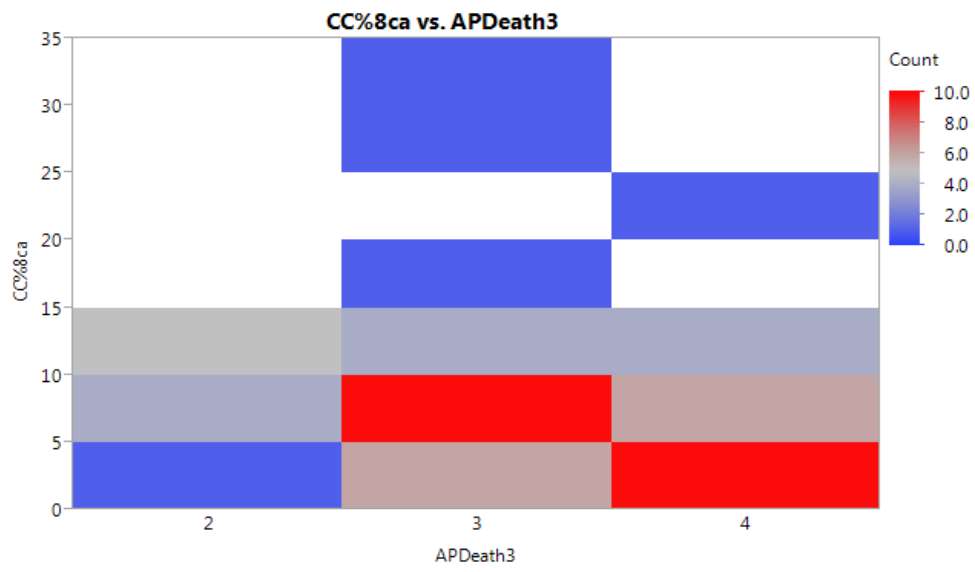

Figure S16.

Supplement: BRN628054_Supplementary_FigS15thru16.pdf [file BRN628054_Supplementary_FigS15thru16.pdf]

### Relative risk meta-analysis plot (random effects)

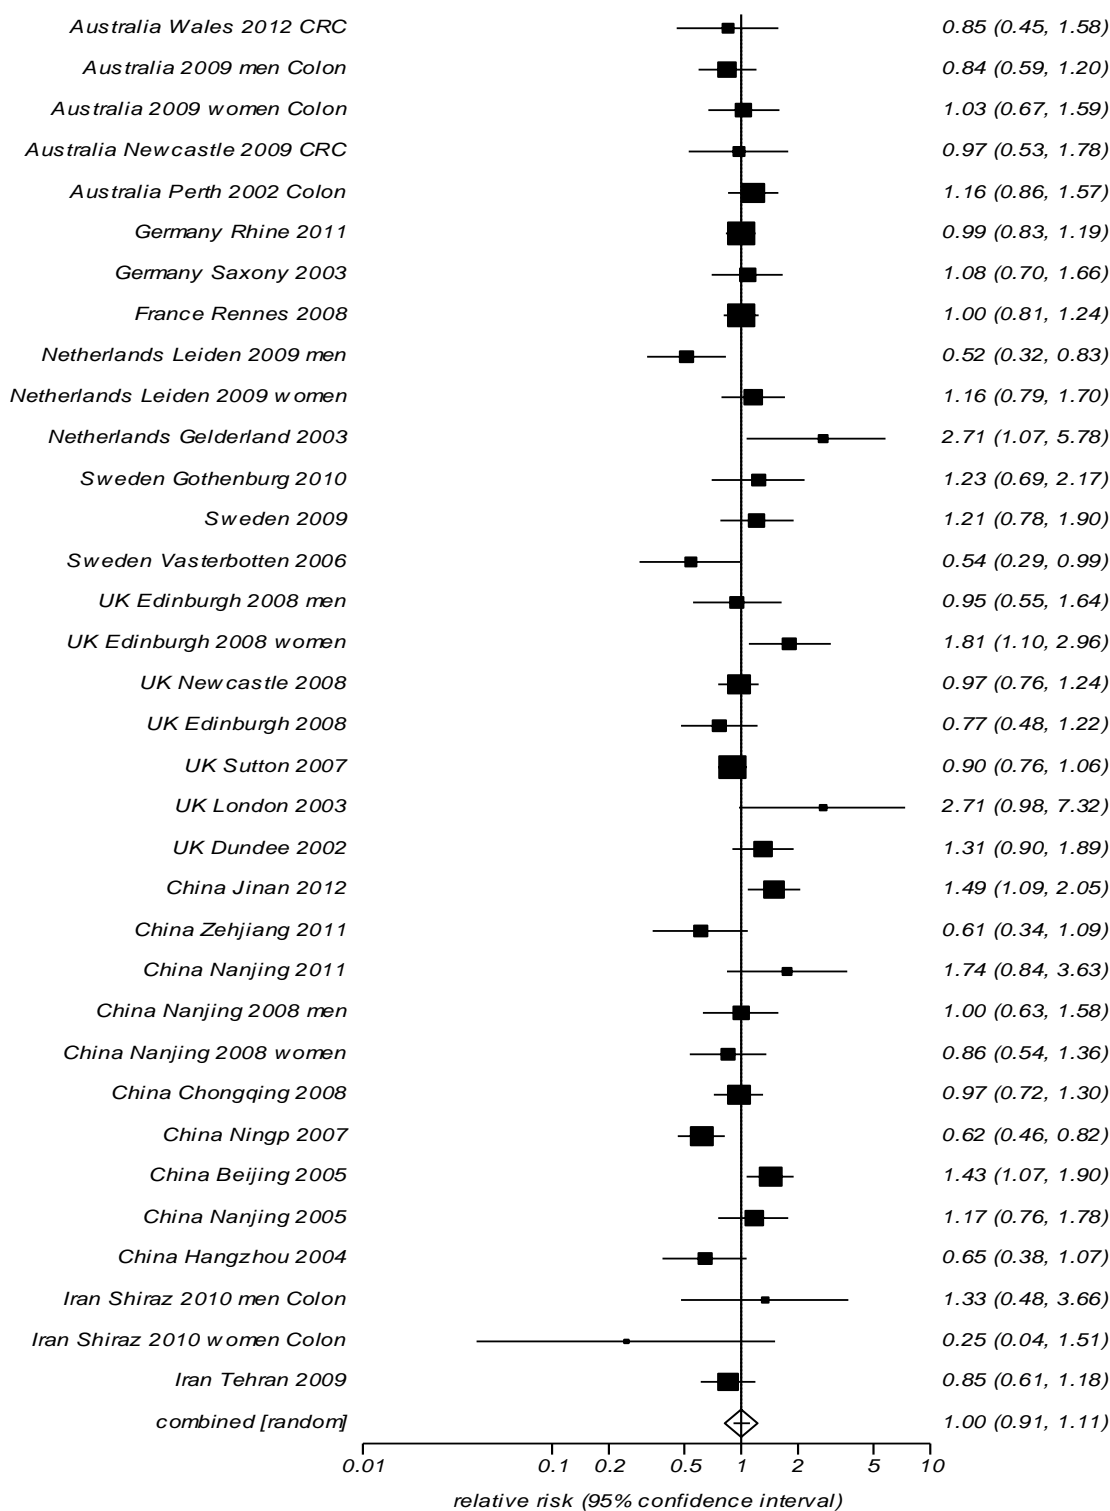

Figure S6.

Supplement: BRN628054_Supplementary_FigS6.pdf [file BRN628054_Supplementary_FigS6.pdf]

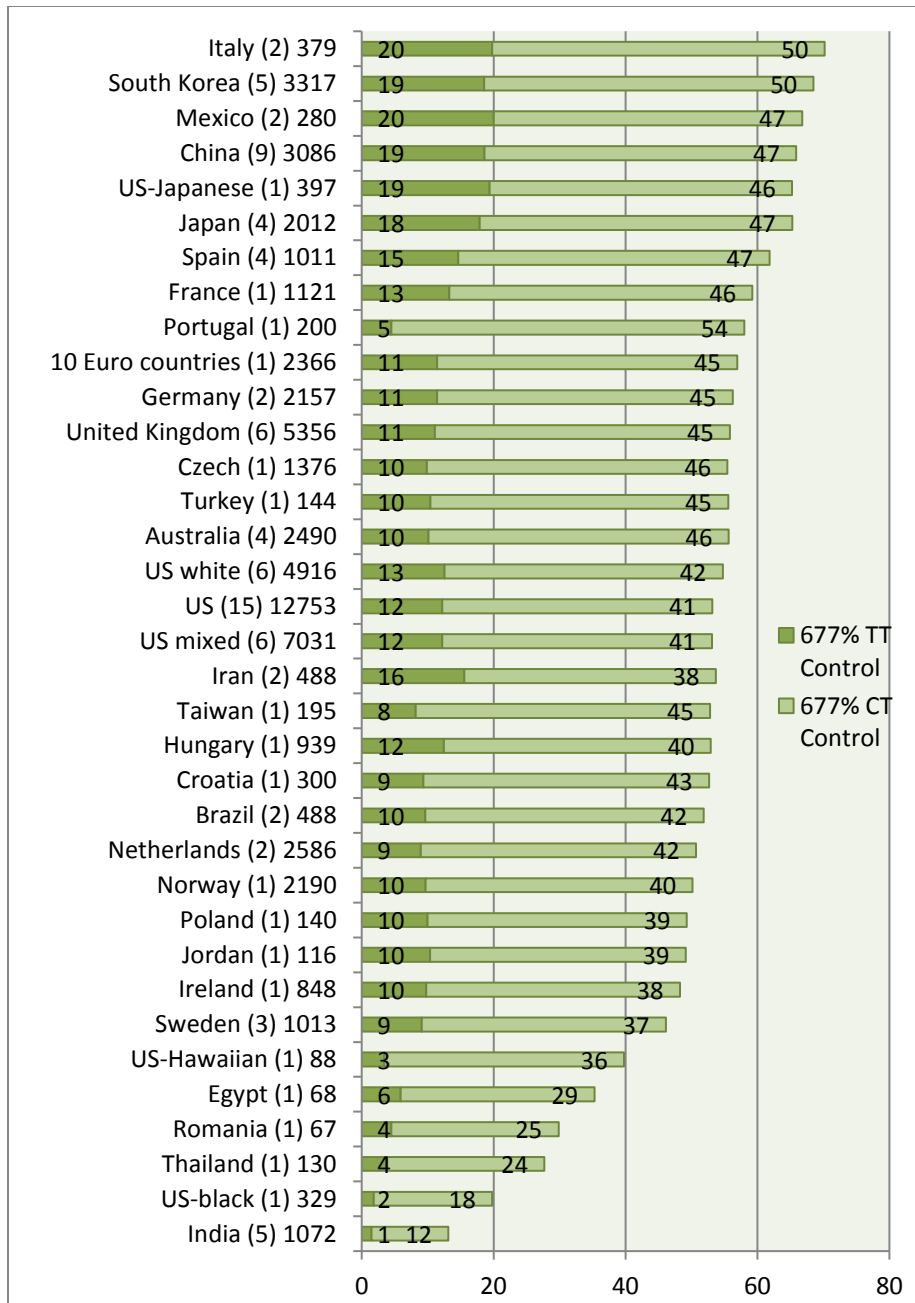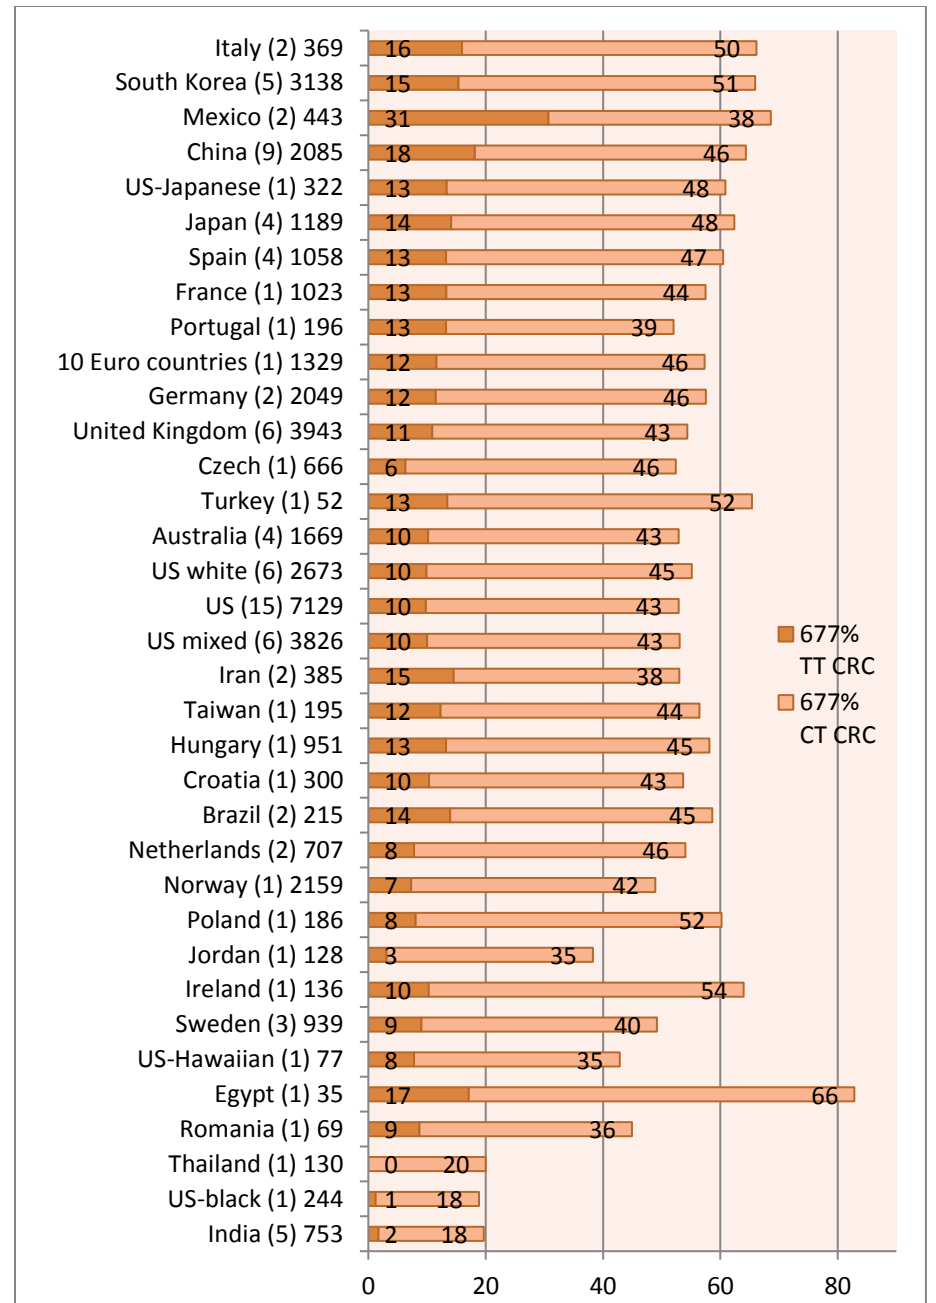

Figure S1.

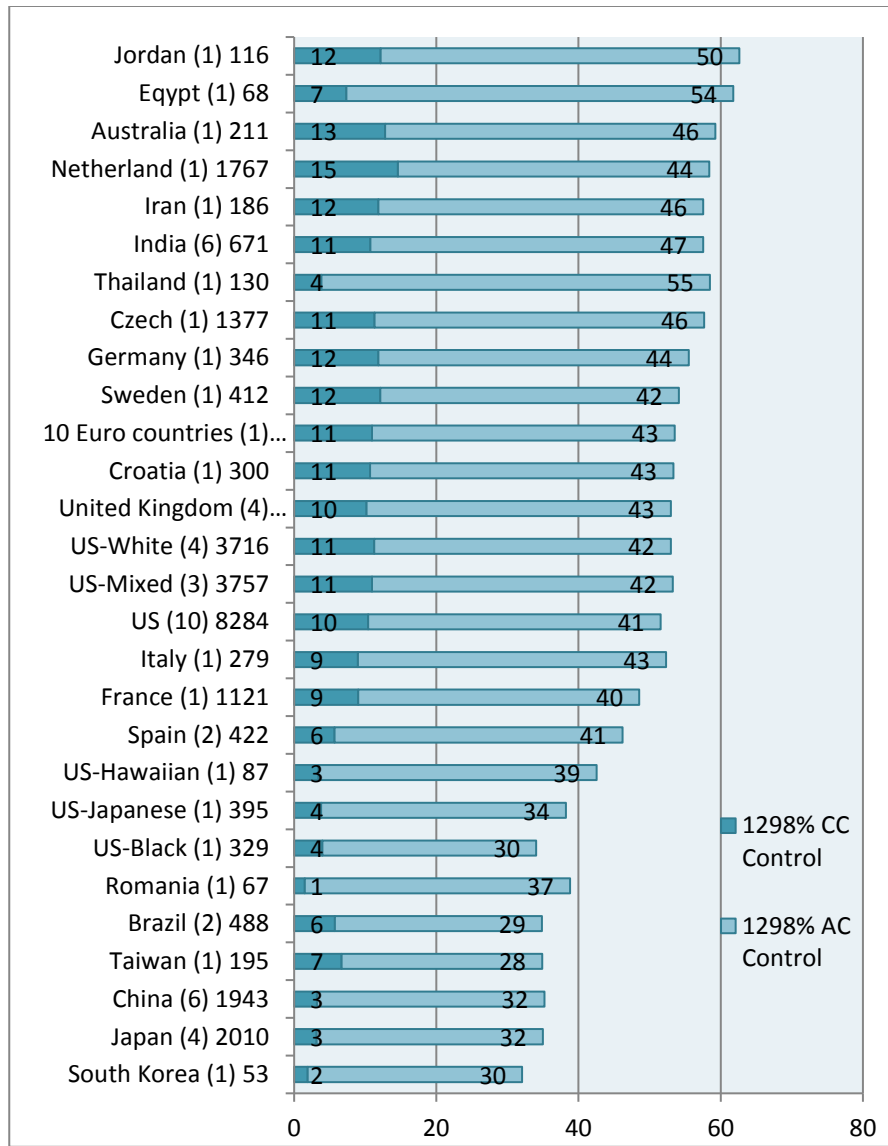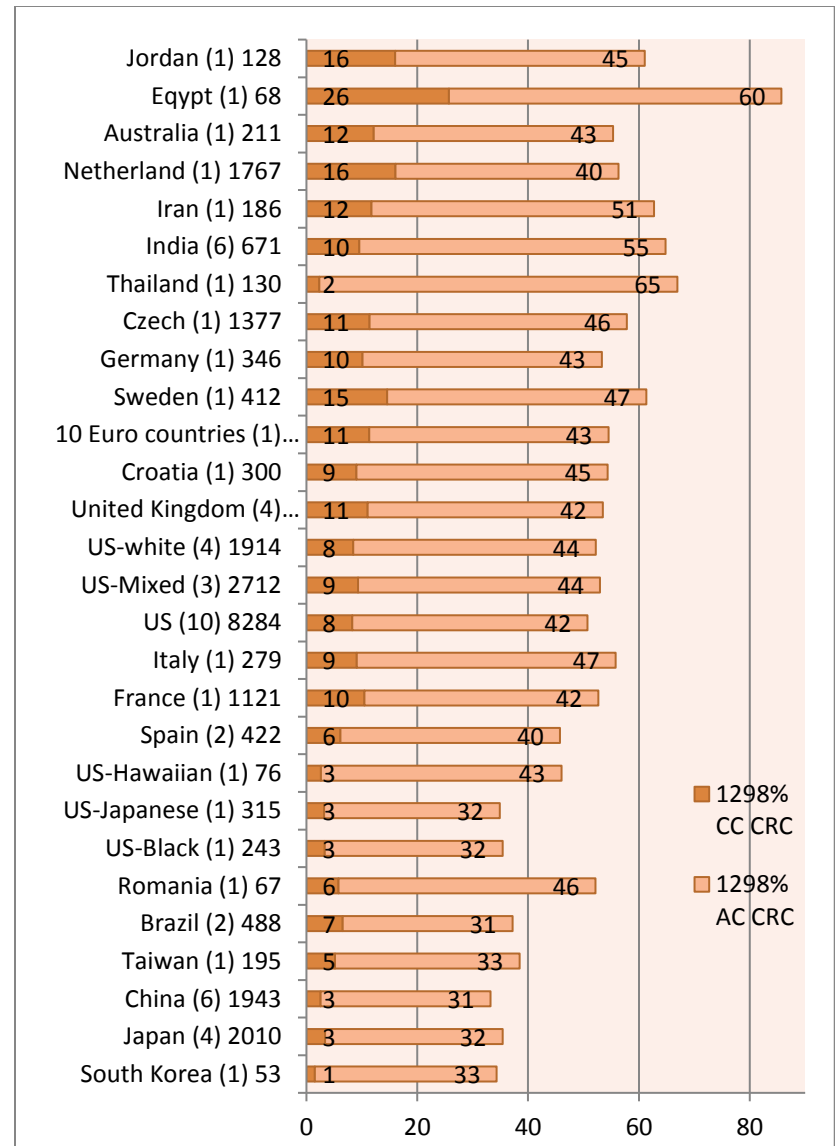

Figure S2.

Supplement: BRN628054_Supplementary_FigsS1and2.pdf [file BRN628054_Supplementary_FigsS1and2.pdf]

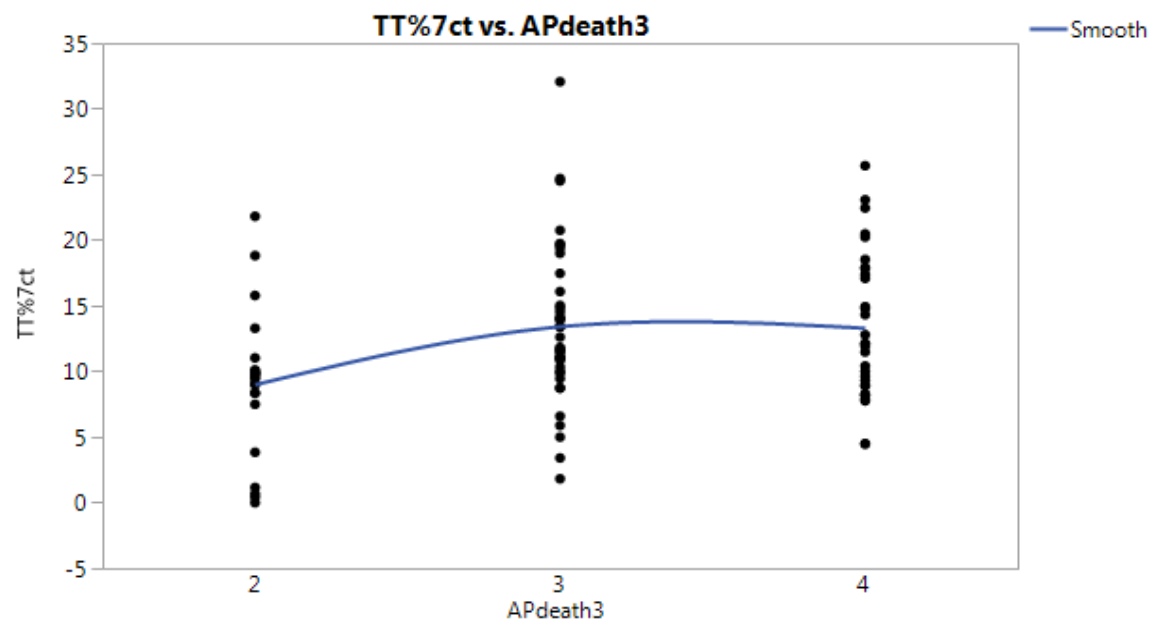

Figure S14a.

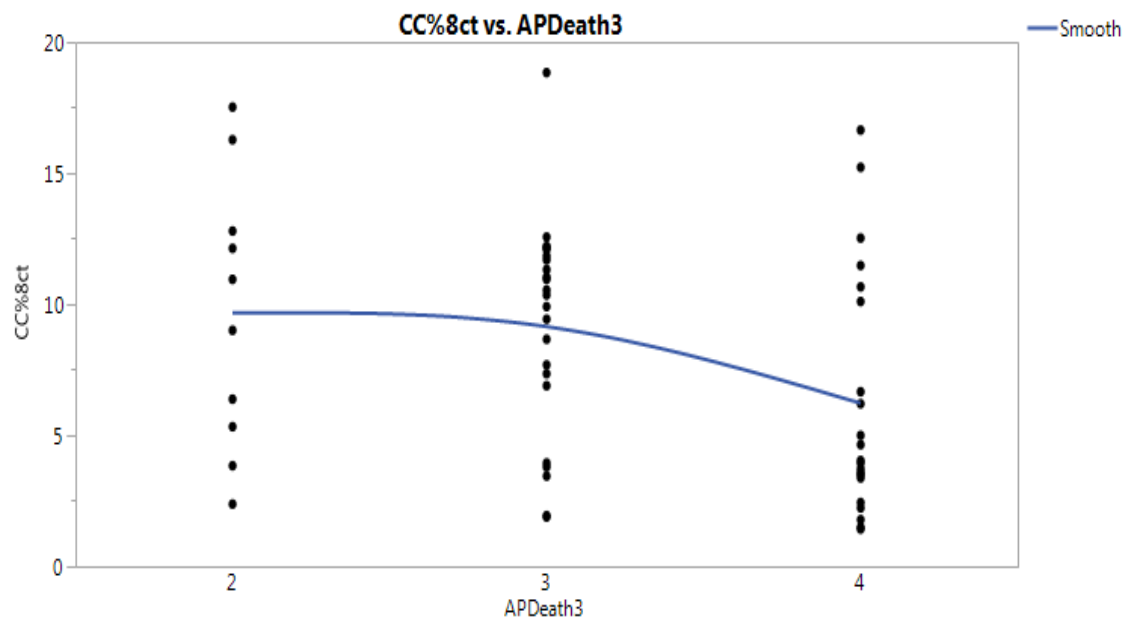

Figure S14b.

Supplement: Shiao_15060052_toSage_FigS14.pdf [file Shiao_15060052_toSage_FigS14.pdf]
